# Supplementary material for: Design of a new multi-functional catalytic system Ni/SO3H@zeolite-Y for three-component synthesis ofN-benzo-imidazo- or -thiazole-1,3-thiazolidinones
Source: Royal Society of Chemistry journal article supplement (doi:10.1039/d0ra08237f), 2020-01-01

# Design of a new multi-functional catalytic system Ni/SO<sub>3</sub>H@zeolite-Y for three-component synthesis of *N*-benzo- imidazo- or -thiazole-1,3-thiazolidinones

Mehdi Kalhor\* and Soodabeh Banibairami

*Department of Organic Chemistry, Payame Noor University, Tehran, 19395-4697, Iran.*

\*Email: mekalhor@gmail.com

## Supporting Information

<sup>1</sup>H, <sup>13</sup>C NMR and Mass Spectra of **4a- 4p**

**3-(1*H*-benzo[*d*]imidazol-2-yl)-2-phenylthiazolidin-4-one (4a)**

---

\*Corresponding author. E-mail addresses: [mekalhor@gmail.com](mailto:mekalhor@gmail.com), Tel: +98 2537179170; Fax: +98 2537179170

IR (KBr) ( $\nu_{\max}$ ): 3360 (NH), 1700 (C=O), 1532 (C=N), 1381, 1269 (C=C), 1117 (C-N), 655 (C-S-C)  $\text{cm}^{-1}$ ;  $^1\text{H-NMR}$  (300 MHz, DMSO- $d_6$ )  $\delta_{\text{H}}$ : 3.93 (1H, d,  $J = 16.53$  Hz, SCH<sub>2</sub>), 4.17 (1H, d,  $J = 16.56$  Hz, SCH<sub>2</sub>), 6.77 (1H, s, CH), 7.06-7.11 (2H, m, H-Ar), 7.24-7.39 (6H, m, H-Ar), 7.50 (1H, d,  $J = 7.50$  Hz, H-Ar), 12.44 (1H, s, NH) ppm;  $^{13}\text{C-NMR}$  (75 MHz, DMSO- $d_6$ )  $\delta_{\text{C}}$ : 32.0, 61.5, 111.2, 121.6, 125.3, 127.9, 128.6, 134.4, 141.4, 144.4, 171.7 ppm; MS (m/z, %): 295.1 (M<sup>+</sup>, 40), 249.1 (31), 220.1 (44), 133.1 (100), 105.1 (69), 77.1 (40).

### **3-(1H-benzo[d]imidazol-2-yl)-2-(2-hydroxyphenyl)thiazolidin-4-one (4b)**

IR (KBr) ( $\nu_{\max}$ ): 3553 (OH), 3329 (NH), 1705 (C=O), 1599 (C=N), 1456, 1363, 1274 (C=C), 1231 (C-N), 669 (C-S-C)  $\text{cm}^{-1}$ ;  $^1\text{H-NMR}$  (300 MHz, DMSO- $d_6$ )  $\delta_{\text{H}}$ : 3.88 (1H, d,  $J = 16.38$  Hz, SCH<sub>2</sub>), 4.04 (1H, d,  $J = 16.44$  Hz, SCH<sub>2</sub>), 6.68 (1H, t,  $J = 7.47$  Hz, H-Ar), 6.76 (1H, s, CH), 6.83 (1H, d,  $J = 8.01$  Hz, H-Ar), 6.92 (1H, d,  $J = 7.59$  Hz, H-Ar), 7.06-7.13 (3H, m, H-Ar), 7.37 (1H, d,  $J = 7.32$  Hz, H-Ar), 7.51 (1H, d,  $J = 7.23$  Hz, H-Ar), 10.11 (1H, s, OH), 12.43 (1H, s, NH) ppm;  $^{13}\text{C-NMR}$  (75 MHz, DMSO- $d_6$ )  $\delta_{\text{C}}$ : 32.1, 57.8, 111.8, 115.6, 117.5, 118.8, 121.5, 121.6, 124.4, 127.0, 128.8, 132.7, 139.8, 144.5, 154.1, 172.1 ppm; MS (m/z, %): 311.1 (M<sup>+</sup>, 63), 238.1 (81), 220.1 (66), 160.1 (38), 118.1 (44), 77.1 (14), 58.1 (62), 43.1 (100).

### **3-(1H-benzo[d]imidazol-2-yl)-2-(2-nitrophenyl)thiazolidin-4-one (4c)**

IR (KBr) ( $\nu_{\max}$ ): 3437, 3338 (NH), 2929 (C-H), 1703 (C=O), 1650, 1540 (C=N), 1520, 1338 (NO<sub>2</sub>), 1455, 1369 (C=C), 1118 (C-N), 1024, 668 (C-S-C)  $\text{cm}^{-1}$ ;  $^1\text{H-NMR}$  (500 MHz, DMSO- $d_6$ )  $\delta_{\text{H}}$ : 3.39 (1H, d,  $J = 16.55$  Hz, SCH<sub>2</sub>), 4.21 (1H, d,  $J = 16.55$  Hz, SCH<sub>2</sub>), 7.06 (3H, d br, CH and H-Ar), 7.43 (2H, s br, H-Ar), 7.47 (1H, d,  $J = 7.90$  Hz, H-Ar), 7.55 (1H, t,  $J = 7.55$  Hz, H-Ar), 8.17 (1H, d,  $J = 8.10$  Hz, H-Ar), 12.51 (1H, br, NH) ppm;  $^{13}\text{C-NMR}$  (125 MHz, DMSO- $d_6$ )  $\delta_{\text{C}}$ : 32.2, 58.2, 122.2, 126.0, 126.1, 129.8 (2C), 135.5, 137.2 (2C), 144.8, 146.8, 172.1 ppm; MS (m/z, %): 340 (M<sup>+</sup>, 30), 294 (32), 220 (65), 206 (30), 178 (25), 160 (100), 133 (25), 104 (18), 90 (20), 77 (18).

### **3-(1H-benzo[d]imidazol-2-yl)-2-(3-nitrophenyl)thiazolidin-4-one (4d)**

IR (KBr) ( $\nu_{\max}$ ): 3336 (NH), 1704 (C=O), 1620 (C=N), 1520, 1349 (NO<sub>2</sub>), 1262 (C=C), 1119 (C-N), 617 (C-S-C)  $\text{cm}^{-1}$ ;  $^1\text{H-NMR}$  (300 MHz, DMSO- $d_6$ )  $\delta_{\text{H}}$ : 3.94 (1H, d,  $J = 16.56$  Hz, SCH<sub>2</sub>), 4.24 (1H, d,  $J = 16.53$  Hz, SCH<sub>2</sub>), 6.93 (1H, s, CH), 7.03-7.13 (2H, m, H-Ar), 7.34 (1H, d,  $J = 7.50$  Hz, H-Ar), 7.50 (1H, d,  $J = 7.35$  Hz, H-Ar), 7.62 (1H, t,  $J = 7.98$  Hz, H-Ar), 7.85 (1H, d,  $J = 7.92$  Hz, H-Ar), 8.10 (1H, d br, H-Ar), 8.29 (1H, t br, H-Ar), 12.47 (1H, s, NH) ppm;  $^{13}\text{C-NMR}$  (75 MHz, DMSO- $d_6$ )  $\delta_{\text{C}}$ : 32.0, 60.6, 111.9, 117.6, 120.5, 121.6, 121.8, 122.9, 130.3, 131.8, 132.7, 139.8, 143.9, 144.3, 147.9, 171.6 ppm; MS (m/z, %): 340 (M<sup>+</sup>, 100), 294.1 (86), 265.1 (39), 219.1 (37), 164.1 (27), 118 (43), 91 (28).

### **3-(1H-benzo[d]imidazol-2-yl)-2-(4-nitrophenyl)thiazolidin-4-one (4e)**

IR (KBr) ( $\nu_{\max}$ ): 3477 (NH), 1708 (C=O), 1617, 1514 (C=N), 1520, 1349 (NO<sub>2</sub>), 1451, 1345, 1270 (C=C), 1114 (C-N), 626 (C-S-C)  $\text{cm}^{-1}$ ;  $^1\text{H-NMR}$  (300 MHz, DMSO- $d_6$ )  $\delta_{\text{H}}$ : 3.96 (1H, d,  $J = 16.53$  Hz, SCH<sub>2</sub>), 4.20 (1H, d,  $J = 16.53$  Hz, SCH<sub>2</sub>), 6.90 (1H, s, CH), 7.03-7.13 (2H, m, H-Ar), 7.33 (1H, d,  $J = 7.68$  Hz, H-Ar), 7.50 (1H, d,  $J = 7.53$  Hz, H-Ar), 7.66 (2H, d,  $J = 8.70$  Hz, H-Ar), 8.16 (2H, d,  $J = 8.67$  Hz, H-Ar), 12.47 (1H, s, NH) ppm;  $^{13}\text{C-NMR}$  (75 MHz, DMSO- $d_6$ )  $\delta_{\text{C}}$ : 32.0, 60.7, 111.2,

121.7, 122.4, 123.2, 124.0, 126.6, 130.3, 144.3, 146.9, 149.0, 152.9, 171.5 ppm; MS (m/z, %): 340.2 (M<sup>+</sup>, 100), 294.1 (92), 219.1 (50), 164.1 (26), 118.1 (41), 91.1 (27), 77.1 (13).

**3-(1H-benzo[d]imidazol-2-yl)-2-(4-bromophenyl)thiazolidin-4-one (4f)**

IR (KBr) ( $\nu_{\max}$ ): 3413 (NH), 1706 (C=O), 1618, 1535 (C=N), 1486, 1450, 1369, 1270 (C=C), 1227, 1117 (C-N), 1006, 738, 722, 659 (C-S-C), 497 cm<sup>-1</sup>; <sup>1</sup>H-NMR (300 MHz, DMSO-*d*<sub>6</sub>)  $\delta_{\text{H}}$ : 3.92 (1H, d, *J* = 16.53 Hz, SCH<sub>2</sub>), 4.18 (1H, d, *J* = 16.53 Hz, SCH<sub>2</sub>), 6.74 (1H, s, CH), 7.04-7.13 (2H, m, H-Ar), 7.34 (3H, d, *J* = 8.37 Hz, H-Ar), 7.49 (3H, d, *J* = 8.40 Hz, H-Ar), 12.42 (1H, s, NH) ppm; <sup>13</sup>C-NMR (75 MHz, DMSO-*d*<sub>6</sub>)  $\delta_{\text{C}}$ : 32.0, 61.0, 112.0, 119.8, 121.0, 121.6, 127.6, 128.9, 131.2, 131.5, 141.0, 144.3, 171.6 ppm; MS (m/z, %): 375.1 (M<sup>+</sup>, 25), 327.1 (23), 300.1 (100), 144.1 (10), 118.1 (35), 91.1 (28).

**3-(1H-benzo[d]imidazol-2-yl)-2-(2-chlorophenyl)thiazolidin-4-one (4g)**

IR (KBr) ( $\nu_{\max}$ ): 3444, 3349 (NH), 2925 (C-H), 1683 (C=O), 1535 (C=N), 1447, 1303, 1269 (C=C), 1170 (C-N), 743, 647 (C-S-C) cm<sup>-1</sup>; <sup>1</sup>H-NMR (500 MHz, DMSO-*d*<sub>6</sub>)  $\delta_{\text{H}}$ : 3.97 (1H, d, *J* = 16.50 Hz, SCH<sub>2</sub>), 4.11 (1H, d, *J* = 16.45 Hz, SCH<sub>2</sub>), 6.85 (1H, s, CH), 7.06-7.15 (3H, m, H-Ar), 7.24 (1H, t, *J* = 7.55 Hz, H-Ar), 7.30 (1H, t, *J* = 7.60 Hz, H-Ar), 7.38 (1H, d, *J* = 7.90 Hz, H-Ar), 7.53 (2H, t, *J* = 7.60 Hz, H-Ar), 12.52 (1H, s, NH) ppm; <sup>13</sup>C-NMR (125 MHz, DMSO-*d*<sub>6</sub>)  $\delta_{\text{C}}$ : 32.1, 59.5, 112.4, 118.2, 122.0, 122.2, 125.2, 128.1, 129.9, 130.5, 131.5, 133.3, 138.3, 140.2, 144.7, 172.2 ppm; MS (m/z, %): 329 (M<sup>+</sup>, 10), 294 (100), 252 (30), 220 (94), 135 (30), 118 (20), 91 (18).

**3-(1H-benzo[d]imidazol-2-yl)-2-(4-methoxyphenyl) thiazolidin-4-one (4h)**

IR (KBr) ( $\nu_{\max}$ ): 3478 (NH), 1707 (C=O), 1638, 1617, 1540, 1511 (C=N), 1452, 1373 (C=C), 1270, 1254 (C-O), 1178 (C-N), 1116, 1026, 843, 726, 665 (C-S-C), 607 cm<sup>-1</sup>; <sup>1</sup>H-NMR (300 MHz, DMSO-*d*<sub>6</sub>)  $\delta_{\text{H}}$ : 3.68 (3H, s, OCH<sub>3</sub>), 3.91 (1H, d, *J* = 16.53 Hz, SCH<sub>2</sub>), 4.17 (1H, d, *J* = 16.53 Hz, SCH<sub>2</sub>), 6.71 (1H, s, CH), 6.83 (2H, d, *J* = 8.61 Hz, H-Ar), 7.04-7.12 (2H, m, H-Ar), 7.31 (2H, d, *J* = 8.61 Hz, H-Ar), 7.37 (1H, d, *J* = 7.53 Hz, H-Ar), 7.48 (1H, d, *J* = 7.14 Hz, H-Ar), 12.41 (1H, s, NH) ppm; <sup>13</sup>C-NMR (75 MHz, DMSO-*d*<sub>6</sub>)  $\delta_{\text{C}}$ : 32.2, 55.0, 61.5, 112.0, 113.7, 113.9, 121.6, 126.9, 133.2, 144.4, 158.9, 171.6 ppm; MS (m/z, %): 325.2 (M<sup>+</sup>, 100), 279.1 (59), 250.1 (72), 165.1 (55), 135.1 (51), 118.1 (33), 91 (22).

**3-(1H-benzo[d]imidazol-2-yl)-2-(4-methylphenyl) thiazolidin-4-one (4i)**

IR (KBr) ( $\nu_{\max}$ ): 3413 (NH), 1707 (C=O), 1638, 1617 (C=N), 1531, 1511, 1452, 1373, 1270 (C=C), 1254, 1178 (C-N), 726, 665, 607 (C-S-C) cm<sup>-1</sup>; <sup>1</sup>H-NMR (300 MHz, DMSO-*d*<sub>6</sub>)  $\delta_{\text{H}}$ : 2.21 (3H, s, CH<sub>3</sub>), 3.91 (1H, d, *J* = 16.56 Hz, SCH<sub>2</sub>), 4.15 (1H, d, *J* = 16.53 Hz, SCH<sub>2</sub>), 6.71 (1H, s, CH), 7.03-7.11 (4H, m, CH), 7.27 (2H, d, *J* = 7.89 Hz, H-Ar), 7.38 (1H, d, *J* = 7.17 Hz, H-Ar), 7.51 (1H, d, *J* = 7.62 Hz, H-Ar), 12.41 (1H, br, NH,) ppm; <sup>13</sup>C-NMR (75 MHz, DMSO-*d*<sub>6</sub>)  $\delta_{\text{C}}$ : 20.6, 32.12, 61.5, 119.8, 121.6, 125.3, 126.6, 128.9, 129.1, 137.0, 138.4, 171.6 ppm; MS (m/z, %): 309.2 (M<sup>+</sup>, 100), 263.1 (71), 234.1 (75), 175.1 (27), 135.1 (74), 91 (26).

**3-(1H-benzo[d]imidazol-2-yl)-2-(3,4-dimethoxyphenyl) thiazolidin-4-one (4j)**

IR (KBr) ( $\nu_{\max}$ ): 3400 (NH), 1704 (C=O), 1637, 1617, 1537 (C=N), 1514, 1452 (C=C), 1273, 1256, 1239 (C-O), 1141 (C-N), 648 (C-S-C), 616, 478 cm<sup>-1</sup>; <sup>1</sup>H-NMR (300 MHz, DMSO-*d*<sub>6</sub>)  $\delta_{\text{H}}$ : 3.67 (3H, s, OCH<sub>3</sub>), 3.72 (3H, s, OCH<sub>3</sub>), 3.90 (1H, d, *J* = 16.50 Hz, SCH<sub>2</sub>), 4.16 (1H, d, *J* = 16.53 Hz,

SCH<sub>2</sub>), 6.70 (1H, s, CH), 6.81 (2H, s, H-Ar), 7.05-7.13 (3H, m, H-Ar), 7.38 (1H, d, *J* = 7.47 Hz, H-Ar), 7.48 (1H, d, *J* = 7.29 Hz, H-Ar), 12.42 (1H, s, NH) ppm; <sup>13</sup>C-NMR (75 MHz, DMSO-*d*<sub>6</sub>) δ<sub>C</sub>: 32.1, 55.4 (2C), 61.6, 109.7, 111.4, 111.8, 117.0, 117.7, 121.5, 121.7, 132.7, 133.4, 140.0, 144.4, 148.5, 148.8, 171.7 ppm; MS (m/z, %): 355.2 (M<sup>+</sup>, 100), 313.2 (61), 280.2 (50), 192.1 (17), 165.1 (81), 118.1 (30), 91.1 (18).

### **3-(Benzo[*d*]thiazol-2-yl)-2-(2-hydroxyphenyl)thiazolidin-4-one (4k)**

IR (KBr) (ν<sub>max</sub>): 1700 (C=O), 1532 (C=N), 1381, 1269 (C=C), 1117 (C-N), 655 (C-S-C) cm<sup>-1</sup>; <sup>1</sup>H-NMR (300 MHz, DMSO-*d*<sub>6</sub>) δ<sub>H</sub>: 3.95 (1H, d, *J* = 16.59 Hz, SCH<sub>2</sub>), 4.09 (1H, d, *J* = 16.56 Hz, SCH<sub>2</sub>), 6.68 (1H, t, *J* = 7.28 Hz, CH), 6.83 (3H, q, *J* = 8.78 Hz, H-Ar), 7.08 (1H, t, *J* = 7.42 Hz, H-Ar), 7.28-7.40 (2H, m, H-Ar), 7.64 (1H, d, *J* = 7.8 Hz, H-Ar), 7.99 (1H, d, *J* = 7.58 Hz, H-Ar), 10.12 (1H, s, OH) ppm; <sup>13</sup>C-NMR (75 MHz, DMSO-*d*<sub>6</sub>) δ<sub>C</sub>: 32.3, 59.5, 115.6, 118.8, 121.2, 121.8, 124.2, 125.0, 126.2, 126.4, 128.9, 131.3, 147.7, 154.2, 156.0, 172.1 ppm; MS (m/z, %): 328.6 (M<sup>+</sup>, 48), 255.6 (100), 237.6 (9.3), 177.5 (21), 137.5 (27), 108.4 (11), 91.5 (8).

### **3-(Benzo[*d*]thiazol-2-yl)-2-(3-nitrophenyl)thiazolidin-4-one (4l)**

IR (KBr) (ν<sub>max</sub>): 1690 (C=O), 1617, 1537 (C=N), 1467, 1369, 1274 (C=C), 1349, 1530 (NO<sub>2</sub>), 1228 (C-N), 658 (C-S-C) cm<sup>-1</sup>; <sup>1</sup>H-NMR (300 MHz, DMSO-*d*<sub>6</sub>) δ<sub>H</sub>: 4.02 (1H, d, *J* = 16.73 Hz, SCH<sub>2</sub>), 4.32 (1H, d, *J* = 16.71 Hz, SCH<sub>2</sub>), 7.06 (1H, s, CH), 7.29-7.40 (2H, m, H-Ar), 7.62 (2H, t, *J* = 7.78 Hz, H-Ar), 7.86 (1H, d, *J* = 7.77 Hz, H-Ar), 8.00 (1H, d, *J* = 7.45 Hz, H-Ar), 8.10 (1H, q, *J* = 1.35 Hz, H-Ar), 8.34 (1H, s, H-Ar) ppm; <sup>13</sup>C-NMR (75 MHz, DMSO-*d*<sub>6</sub>) δ<sub>C</sub>: 171.6, 155.9, 147.8, 147.5, 143.4, 131.8, 131.2, 130.3, 126.4, 124.4, 122.9, 121.9, 121.2, 120.8, 61.8, 31.8 ppm; MS (m/z, %): 357.6 (M<sup>+</sup>, 100), 315.6 (57), 284.6 (62.5), 255.6 (32.6), 237.6 (32.7), 181.5 (33.2), 135 (56).

### **3-(Benzo[*d*]thiazol-2-yl)-2-(4-nitrophenyl)thiazolidin-4-one (4m)**

IR (KBr) (ν<sub>max</sub>): 1690 (C=O), 1617, 1537 (C=N), 1467, 1369, 1274 (C=C), 1349, 1530 (NO<sub>2</sub>), 1228 (C-N), 658 (C-S-C) cm<sup>-1</sup>; <sup>1</sup>H-NMR (300 MHz, DMSO-*d*<sub>6</sub>) δ<sub>H</sub>: 4.03 (1H, d, *J* = 16.73 Hz, SCH<sub>2</sub>), 4.28 (1H, d, *J* = 16.67 Hz, SCH<sub>2</sub>), 7.03 (1H, s, CH), 7.29-7.41 (2H, m, H-Ar), 7.61 (1H, d, *J* = 7.53 Hz, H-Ar), 7.68 (2H, d, *J* = 8.76 Hz, H-Ar), 8.01 (1H, q, *J* = 1.18 Hz, H-Ar), 8.16 (2H, d, *J* = 8.76 Hz, H-Ar) ppm; <sup>13</sup>C-NMR (75 MHz, DMSO-*d*<sub>6</sub>) δ<sub>C</sub>: 171.6, 156.0, 148.5, 147.5, 147.0, 131.2, 126.7, 126.4, 124.5, 124.0, 122.0, 121.2, 61.7, 31.9 ppm; MS (m/z, %): 357.1 (M<sup>+</sup>, 3.4), 108 (22.9), 69 (23.6), 46 (100).

### **3-(Benzo[*d*]thiazol-2-yl)-2-(4-bromophenyl)thiazolidin-4-one (4n)**

IR (KBr) (ν<sub>max</sub>): 1690 (C=O), 1617, 1537 (C=N), 1467, 1369, 1274 (C=C), 1228 (C-N), 658 (C-S-C) cm<sup>-1</sup>; <sup>1</sup>H-NMR (300 MHz, DMSO-*d*<sub>6</sub>) δ<sub>H</sub>: 3.99 (1H, d, *J* = 16.76 Hz, SCH<sub>2</sub>), 4.26 (1H, d, *J* = 16.73 Hz, SCH<sub>2</sub>), 6.89 (1H, s, CH), 7.30-7.41 (4H, m, H-Ar), 7.50 (2H, d, *J* = 8.41 Hz, H-Ar), 7.63 (1H, d, *J* = 8.75 Hz, H-Ar), 8.00 (1H, d, *J* = 7.74 Hz, H-Ar) ppm; <sup>13</sup>C-NMR (75 MHz, DMSO-*d*<sub>6</sub>) δ<sub>C</sub>: 171.6, 155.9, 147.5, 140.6, 131.5, 131.2, 127.7, 126.3, 124.4, 121.9, 121.2, 121.0, 62.1, 31.8 ppm; MS (m/z, %): 392.4 (M<sup>+</sup>, 58.4), 350.4 (42.5), 317.4 (83.2), 181.5 (49.9), 161.5 (22.4), 135.5 (100), 108.4 (32.9).

### **3-(Benzo[*d*]thiazol-2-yl)-2-(4-methoxyphenyl)thiazolidin-4-one (4o)**

IR (KBr) ( $\nu_{\max}$ ): 1690 (C=O), 1617, 1537 (C=N), 1467, 1369, 1274 (C=C), 1228 (C-N), 658 (C-S-C)  $\text{cm}^{-1}$ ;  $^1\text{H-NMR}$  (300 MHz,  $\text{DMSO-}d_6$ )  $\delta_{\text{H}}$ : : 3.69 (3H, s, OMe), 3.98 (1H, d,  $J = 16.81$  Hz, SCH<sub>2</sub>), 4.26 (1H, d,  $J = 16.79$  Hz, SCH<sub>2</sub>), 6.85 (1H, s, CH), 6.85 (2H, d,  $J = 7.51$  Hz, H-Ar), 7.29-7.42 (4H, m, H-Ar), 7.65 (1H, d,  $J = 7.97$  Hz, H-Ar), 7.99 (1H, d,  $J = 7.69$  Hz, H-Ar) ppm;  $^{13}\text{C-NMR}$  (75 MHz,  $\text{DMSO-}d_6$ )  $\delta_{\text{C}}$ : 171.6, 158.9, 155.9, 147.6, 132.9, 131.2, 127.0, 126.3, 124.3, 121.8, 121.2, 113.9, 62.5, 55.0, 31.9 ppm; MS ( $m/z$ , %): 342.6 ( $\text{M}^+$ , 99.9), 300.6 (71.6), 267.6 (80.5), 208.5 (68.8), 181.5 (59.6), 151.5 (54.7), 135.5 (100), 108.4 (32.8).

**3-(Benzo[*d*]thiazol-2-yl)-2-(4-methylphenyl)thiazolidin-4-one (4p)**

IR (KBr) ( $\nu_{\max}$ ): 1690 (C=O), 1617, 1537 (C=N), 1467, 1369, 1274 (C=C), 1228 (C-N), 658 (C-S-C)  $\text{cm}^{-1}$ ;  $^1\text{H-NMR}$  (300 MHz,  $\text{DMSO-}d_6$ )  $\delta_{\text{H}}$ : 2.23 (3H, s, Me), 3.98 (1H, d,  $J = 16.78$  Hz, SCH<sub>2</sub>), 4.23 (1H, d,  $J = 16.75$  Hz, SCH<sub>2</sub>), 6.86 (1H, s, CH), 7.10 (2H, d,  $J = 7.99$  Hz, H-Ar), 7.25-7.42 (4H, m, H-Ar), 7.64 (1H, d,  $J = 7.81$  Hz, H-Ar), 7.99 (1H, q,  $J = 0.68$  Hz, H-Ar) ppm;  $^{13}\text{C-NMR}$  (75 MHz,  $\text{DMSO-}d_6$ )  $\delta_{\text{C}}$ : 171.7, 155.9, 147.6, 138.1, 137.3, 131.2, 129.2, 126.3, 125.3, 124.3, 121.9, 121.2, 62.6, 31.8, 20.6 ppm; MS ( $m/z$ , %): 326.5 ( $\text{M}^+$ , 93.2), 284.5 (50.5), 251.5 (85), 181.5 (32.1), 135.5 (100), 91.5 (24.3), 69.4 (25.8).

Fig. S1. The  $^1\text{H}$  NMR spectrum of 3-(1*H*-benzo[*d*]imidazol-2-yl)-2-phenylthiazolidin-4-one (4a)

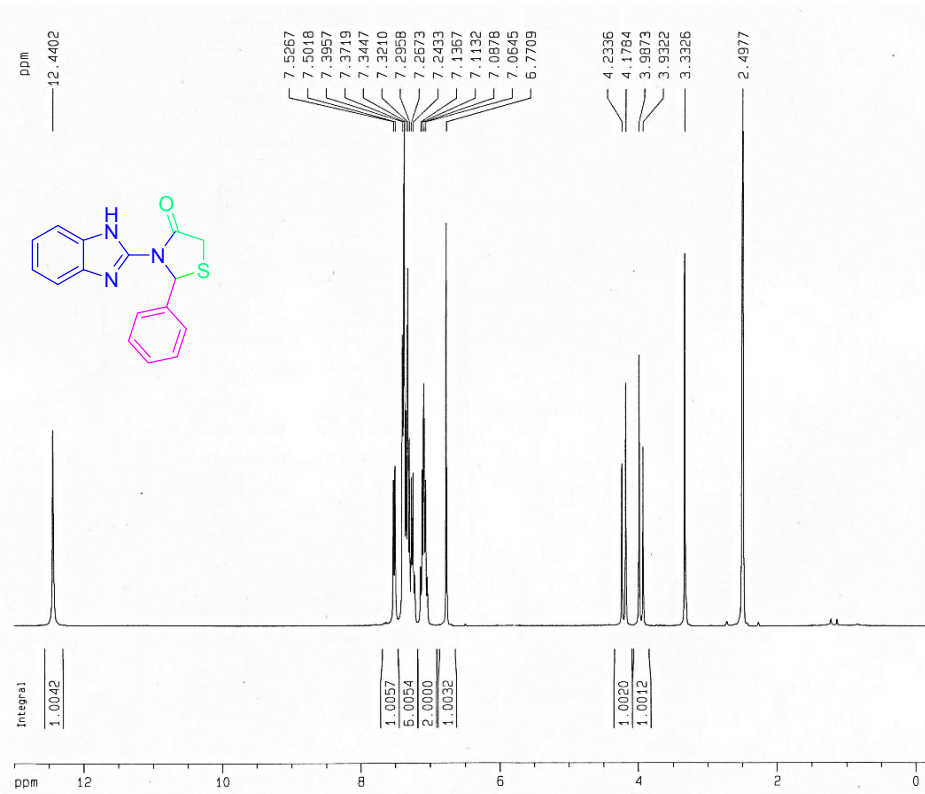

Fig. S2. The  $^{13}\text{C}$  NMR spectrum of 3-(1*H*-benzo[*d*]imidazol-2-yl)-2-phenylthiazolidin-4-one (4a)

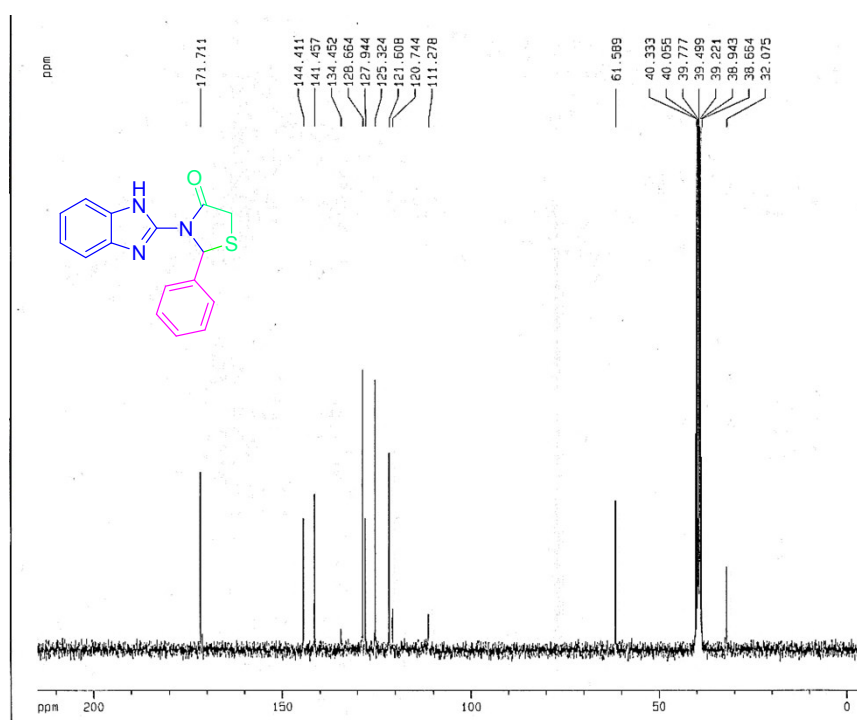

Fig. S3. The Mass spectrum of 3-(1H-benzo[d]imidazol-2-yl)-2-phenylthiazolidin-4-one (4a)

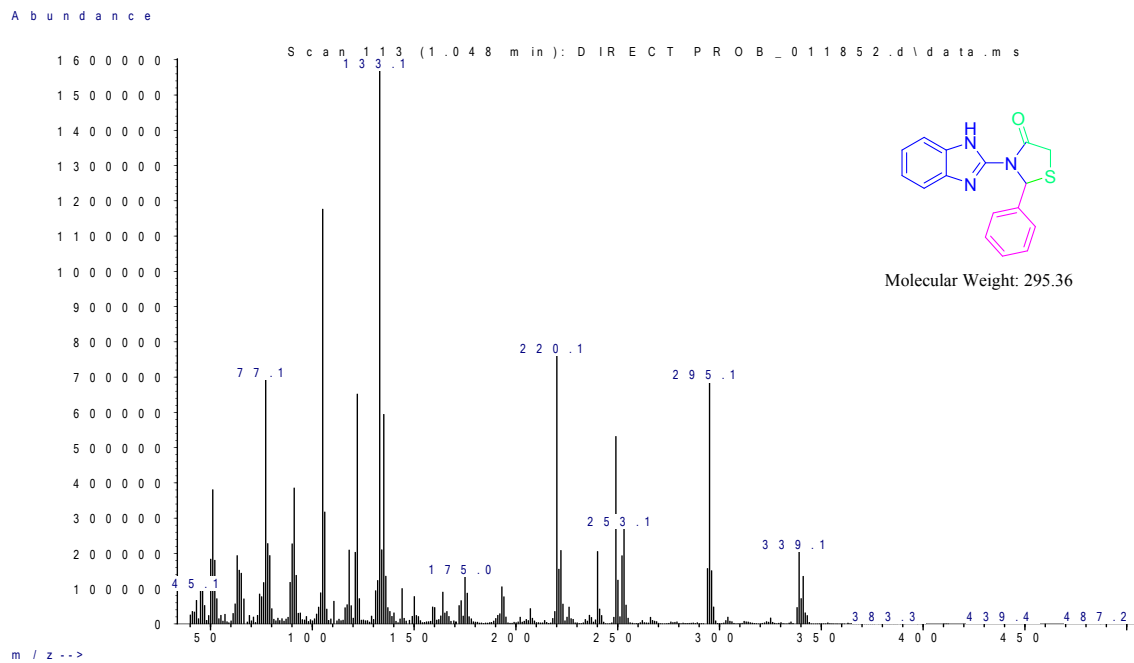

Fig. S4. The <sup>1</sup>H NMR spectrum of 3-(1H-benzo[d]imidazol-2-yl)-2-(2-hydroxyphenyl)thiazolidin-4-one (4b)

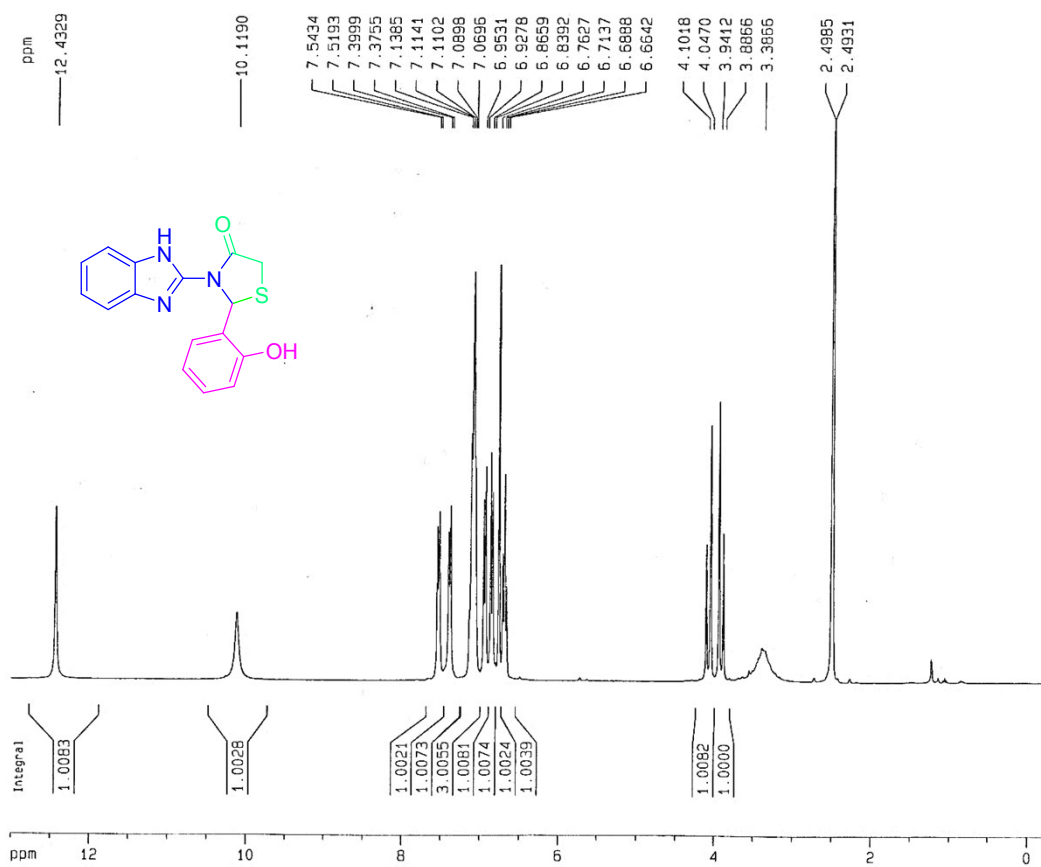

Fig. S5. The  $^{13}\text{C}$  NMR spectrum of 3-(1*H*-benzo[*d*]imidazol-2-yl)-2-(2-hydroxyphenyl)thiazolidin-4-one (4b)

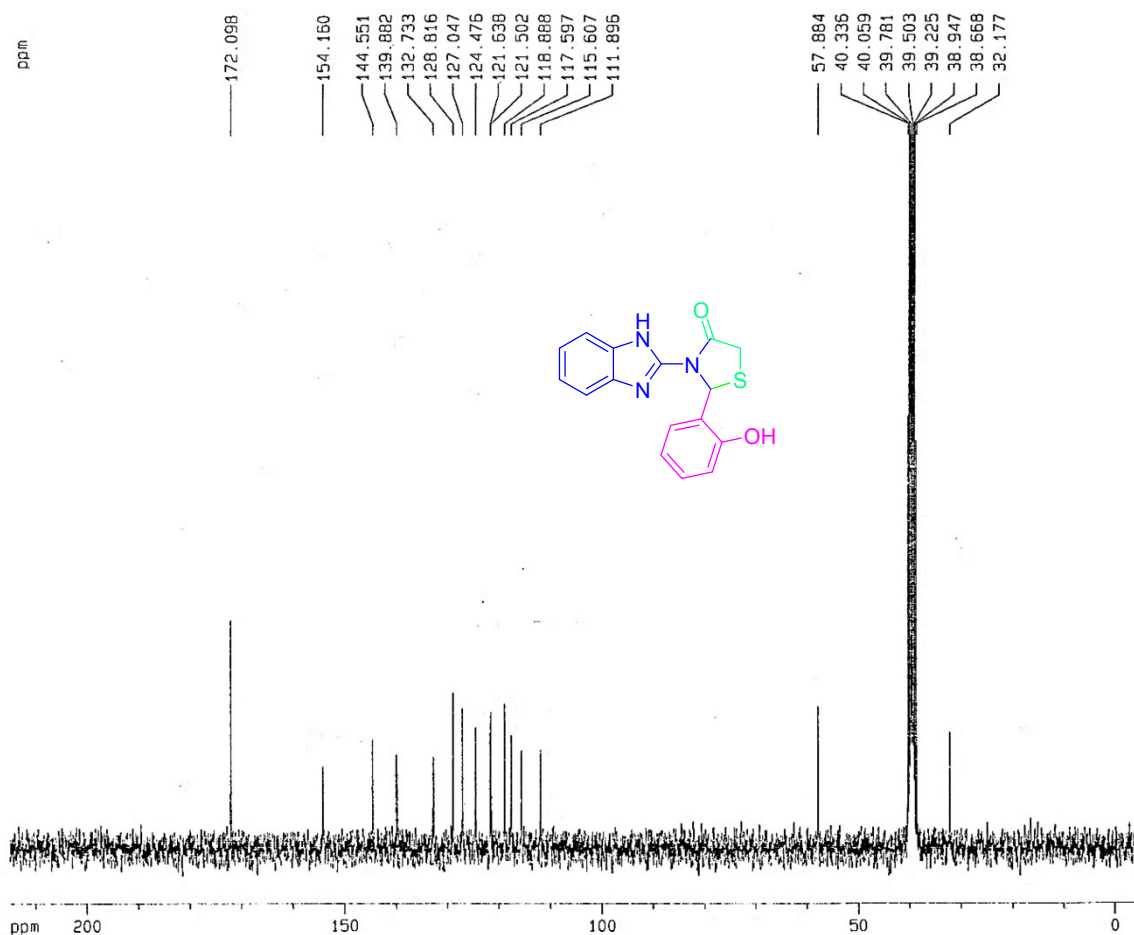

Fig. S6. The Mass spectrum of 3-(1*H*-benzo[*d*]imidazol-2-yl)-2-(2-hydroxyphenyl)thiazolidin-4-one (4b)

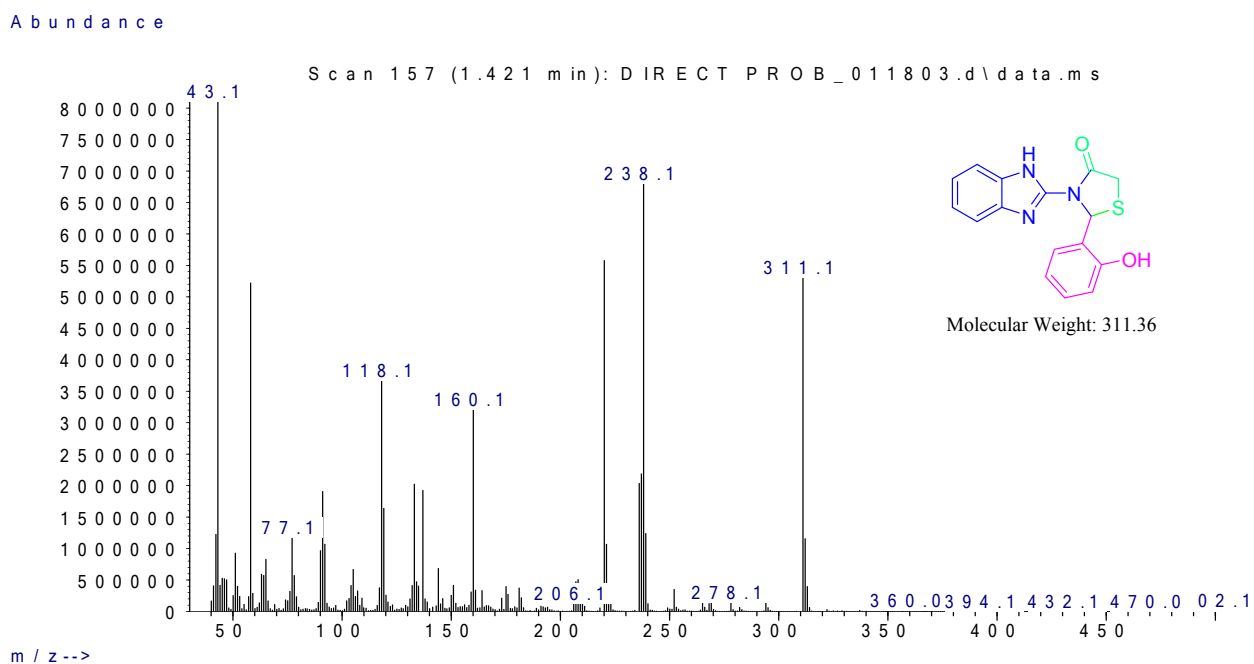



Fig. S7. The  $^1\text{H}$  NMR spectrum of 3-(1H-benzo[d]imidazol-2-yl)-2-(2-nitrophenyl)thiazolidin-4-one (4c)

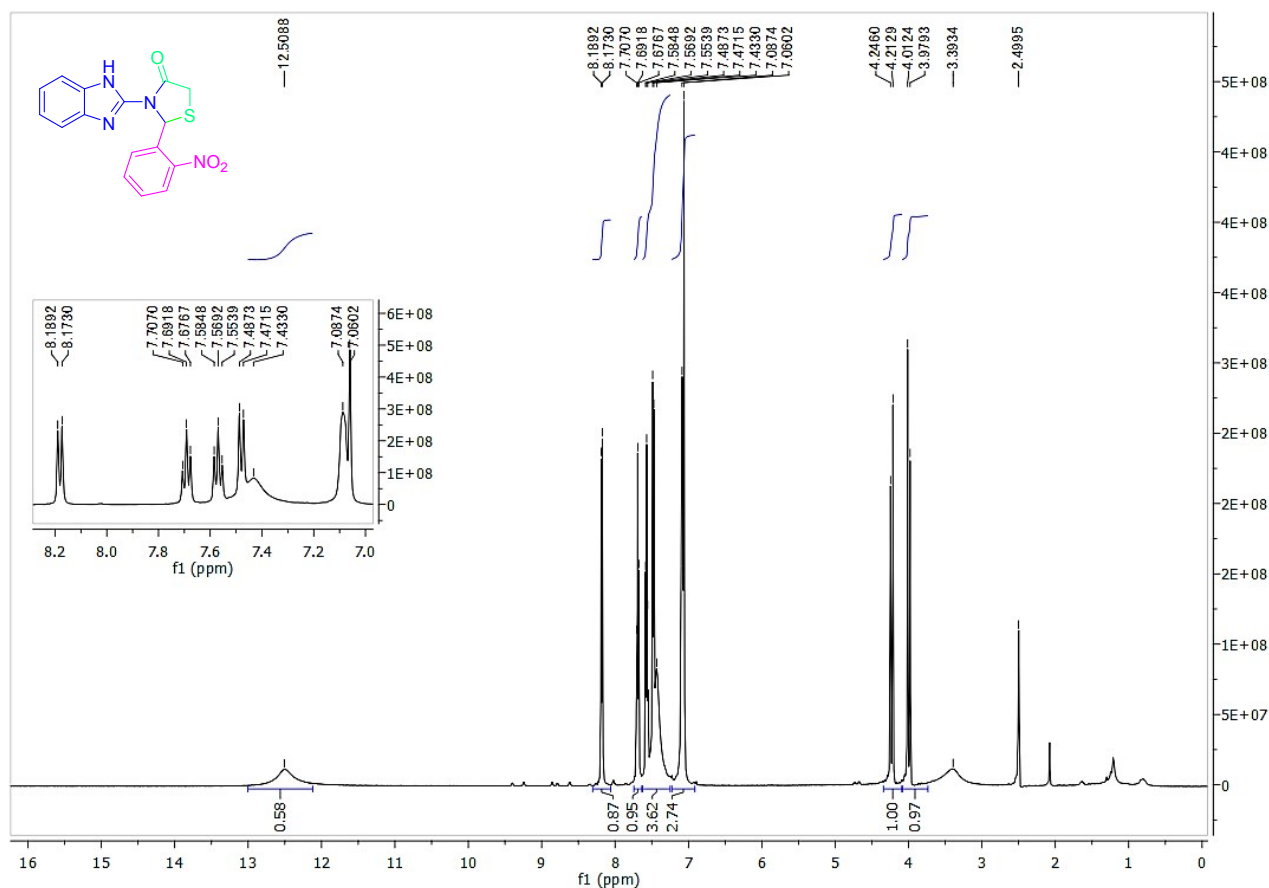

Fig. S8. The  $^{13}\text{C}$  NMR spectrum of 3-(1H-benzo[d]imidazol-2-yl)-2-(2-nitrophenyl)thiazolidin-4-one (4c)

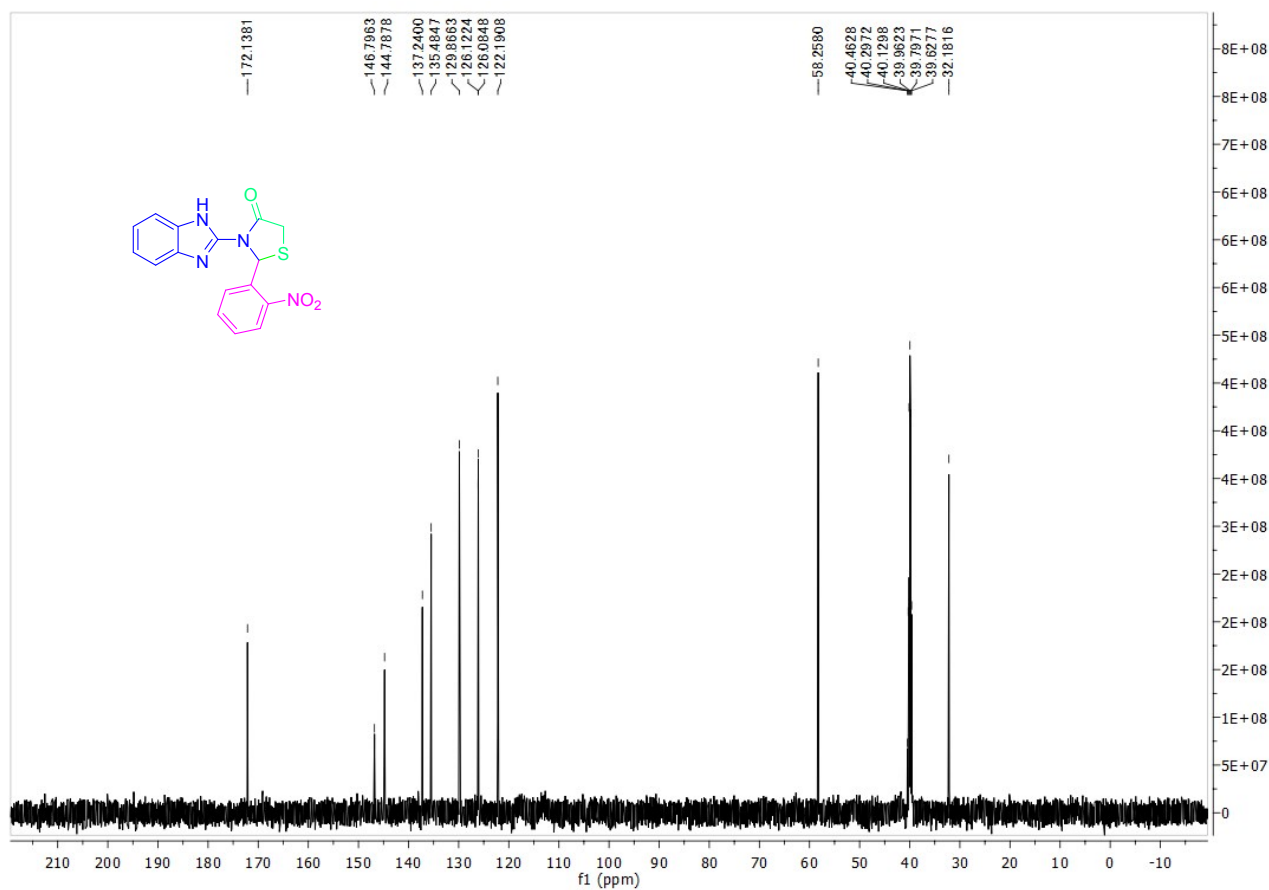

Fig. S9. The Mass spectrum of 3-(1*H*-benzo[*d*]imidazol-2-yl)-2-(2-nitrophenyl)thiazolidin-4-one (4c)

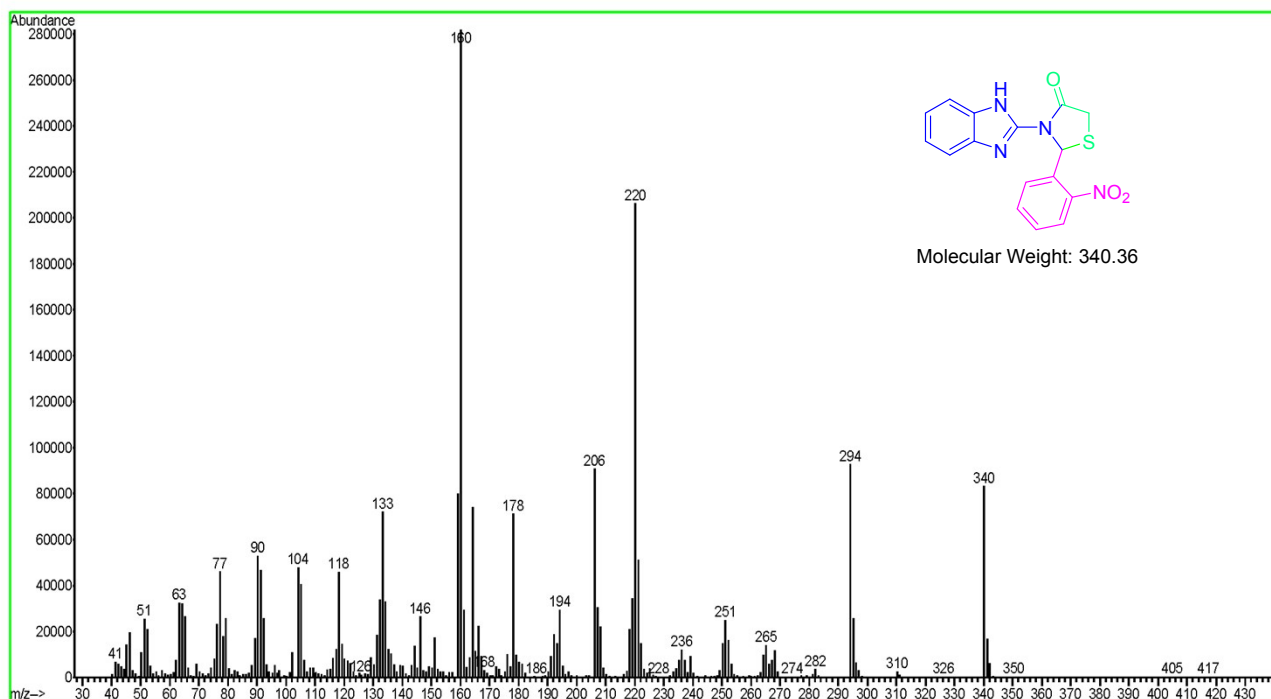

Fig. S10. The <sup>1</sup>H NMR spectrum of 3-(1*H*-benzo[*d*]imidazol-2-yl)-2-(3-nitrophenyl)thiazolidin-4-one (4d)

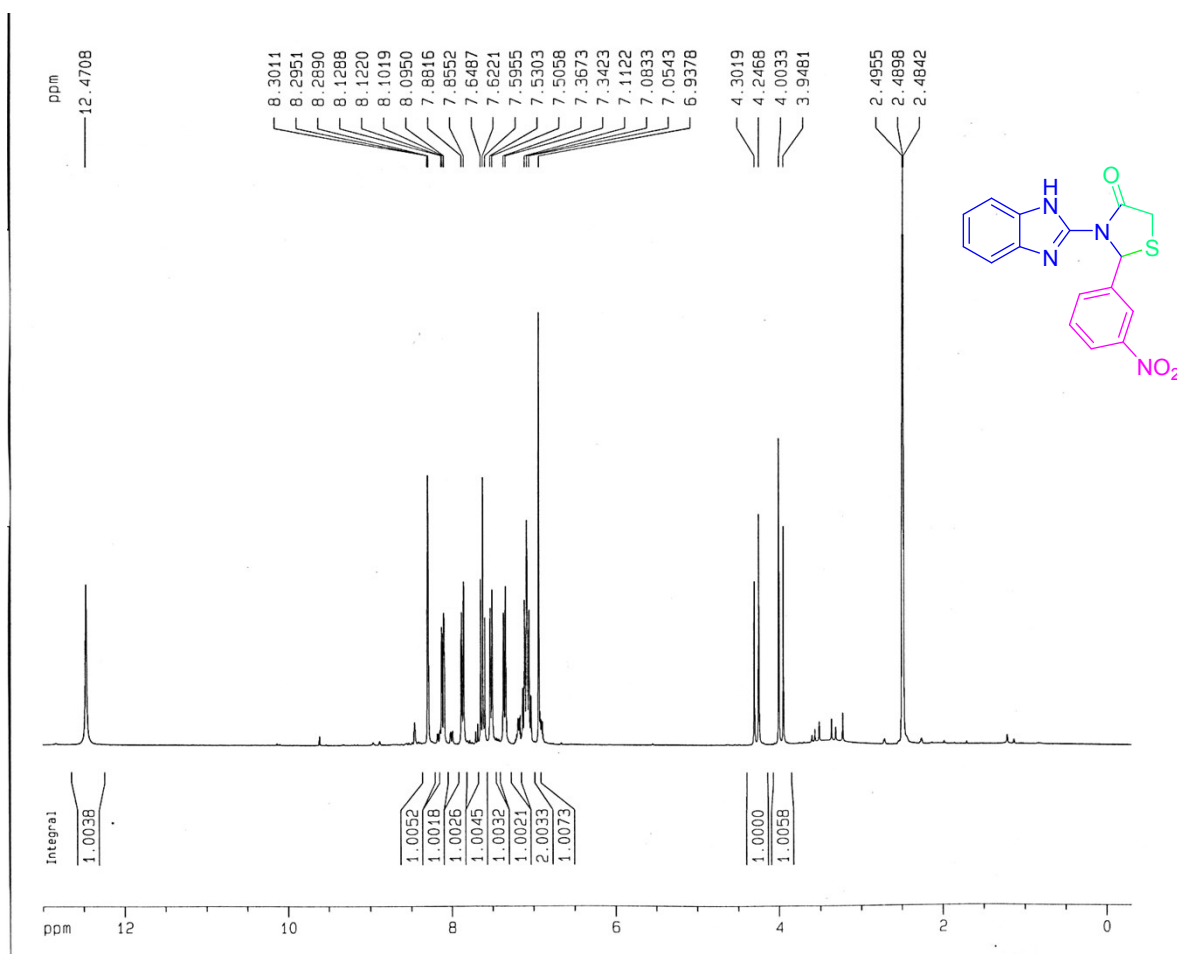

Fig. S11. The  $^{13}\text{C}$  NMR spectrum of 3-(1*H*-benzo[*d*]imidazol-2-yl)-2-(3-nitrophenyl)thiazolidin-4-one (4d)

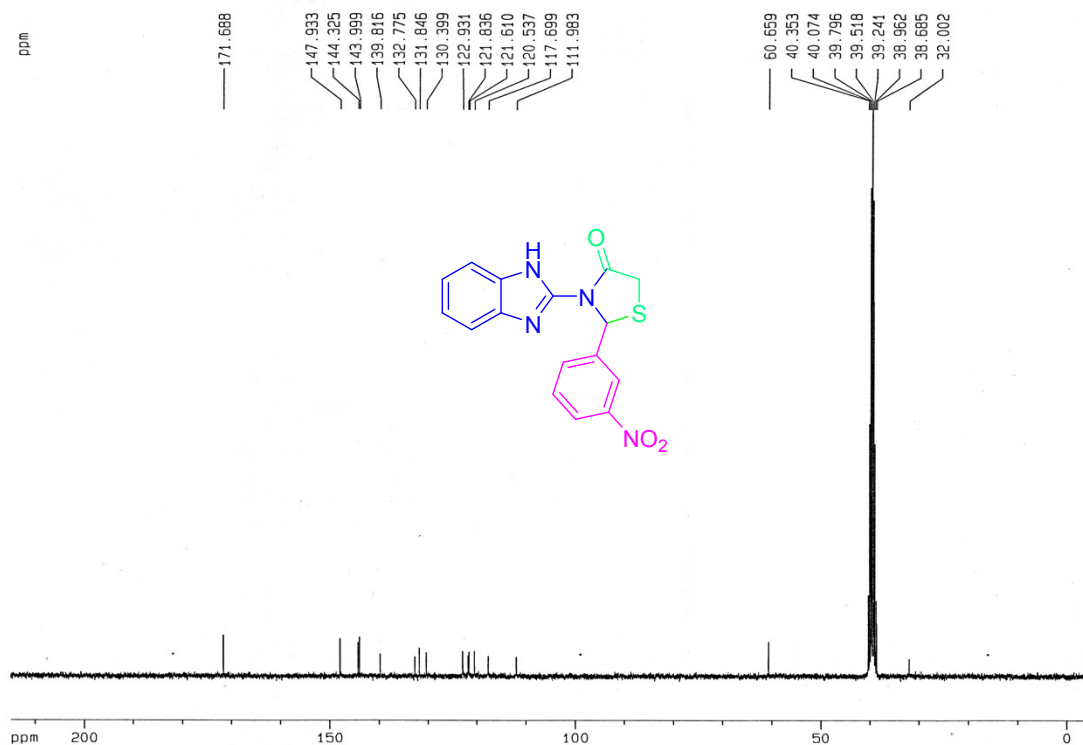

Fig. S12. The Mass spectrum of 3-(1*H*-benzo[*d*]imidazol-2-yl)-2-(3-nitrophenyl)thiazolidin-4-one (4d)

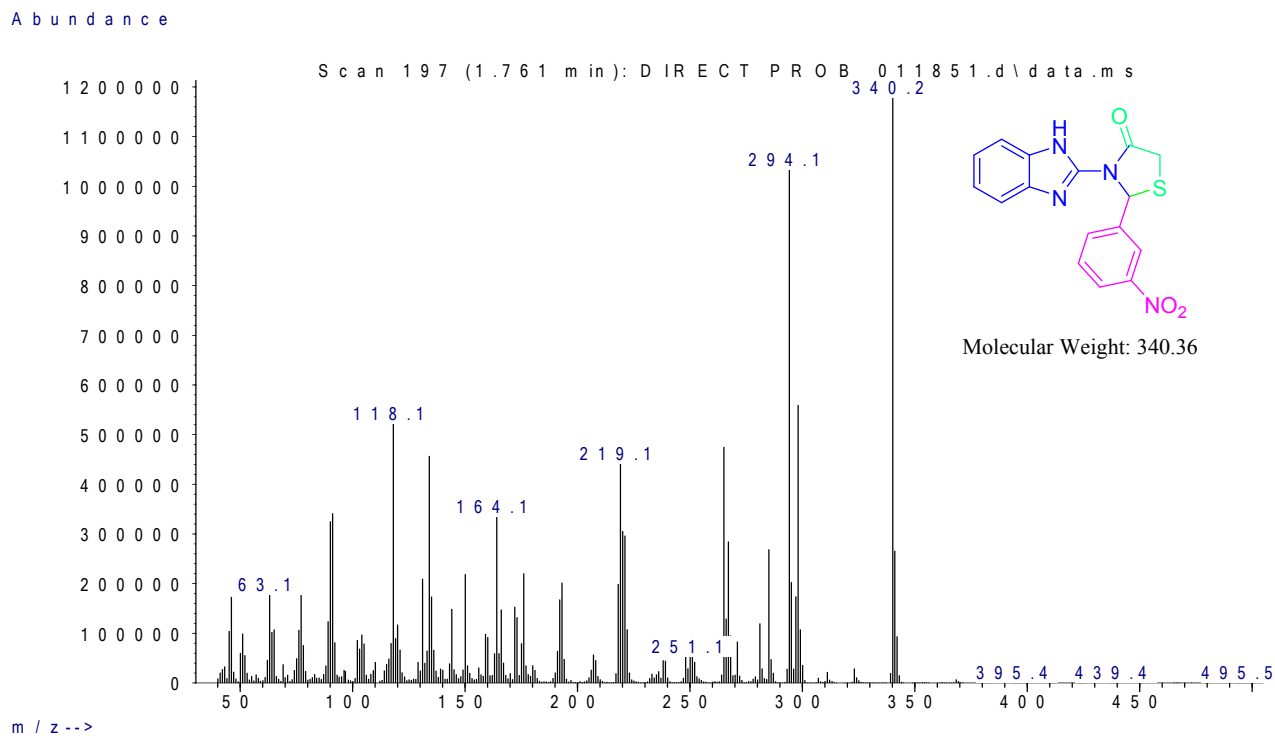

Fig. S13. The <sup>1</sup>H NMR spectrum of 3-(1*H*-benzo[*d*]imidazol-2-yl)-2-(4-nitrophenyl)thiazolidin-4-one (4e)

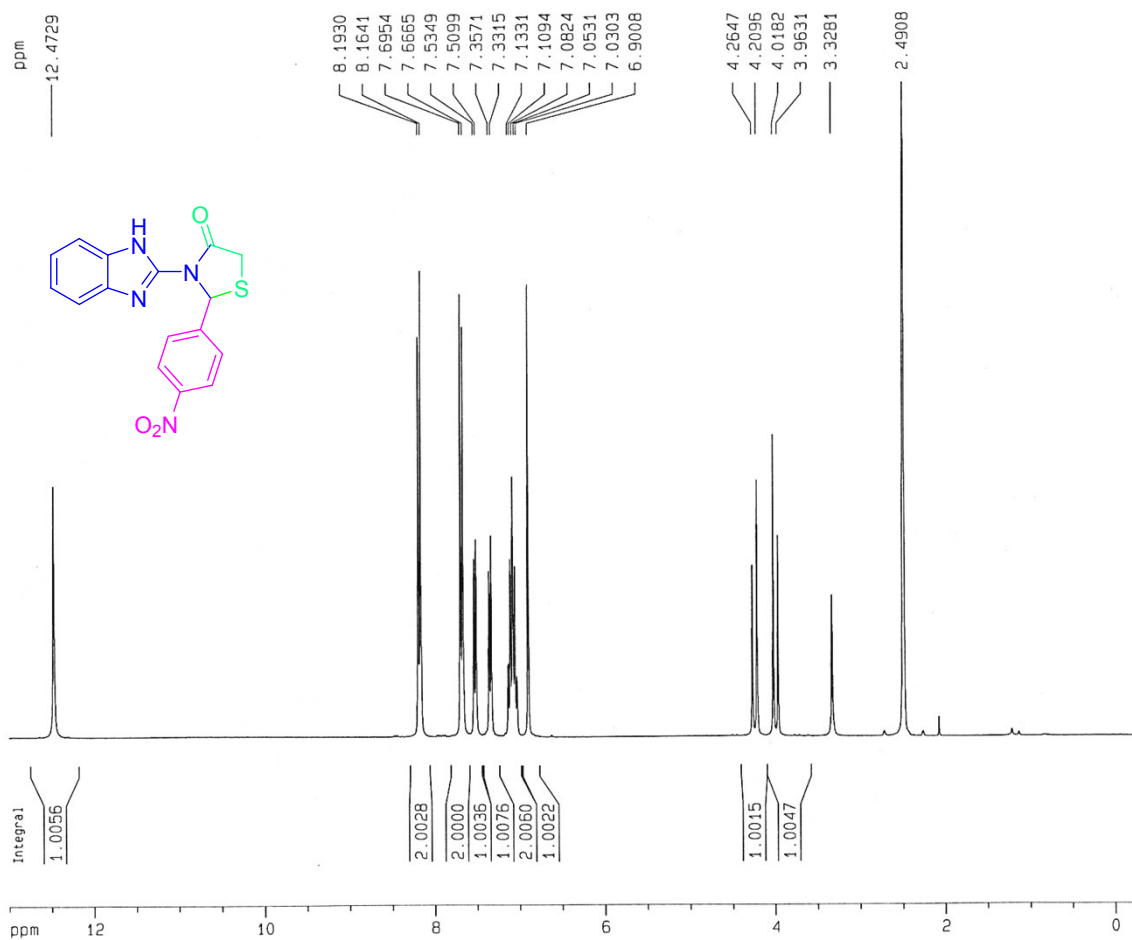

Fig. S14. The <sup>13</sup>C NMR spectrum of 3-(1*H*-benzo[*d*]imidazol-2-yl)-2-(4-nitrophenyl)thiazolidin-4-one (4e)

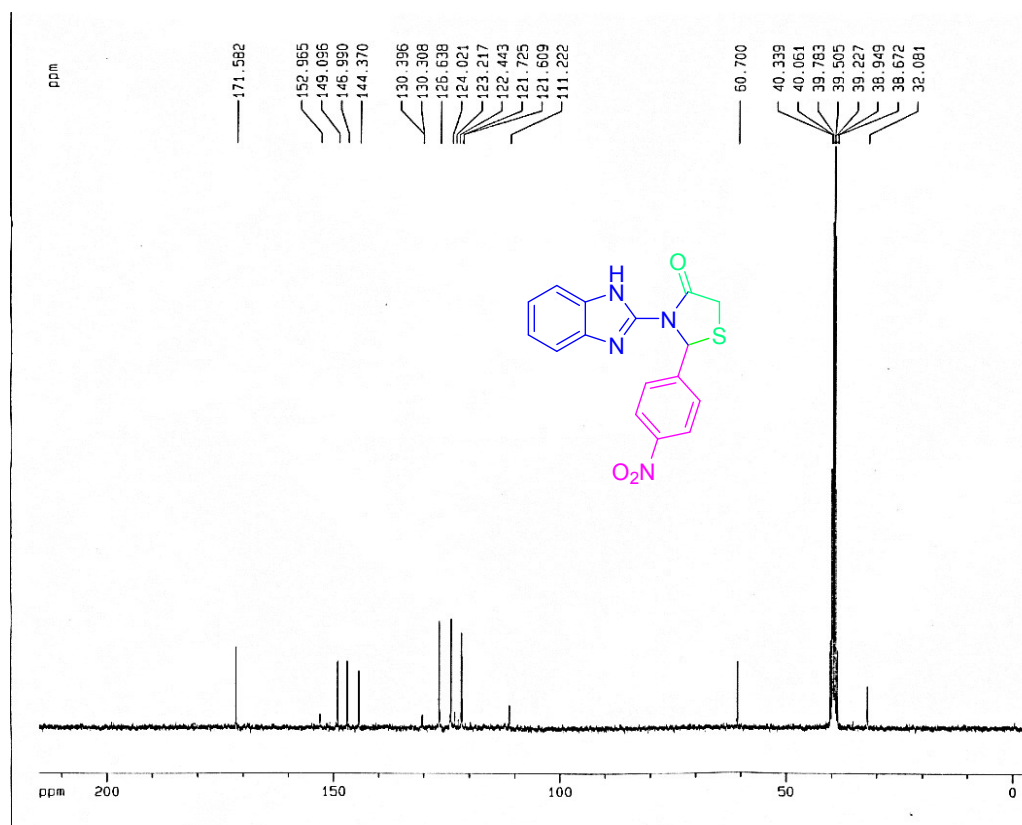

Fig. S15. The Mass spectrum of 3-(1H-benzo[d]imidazol-2-yl)-2-(4-nitrophenyl)thiazolidin-4-one (4e)

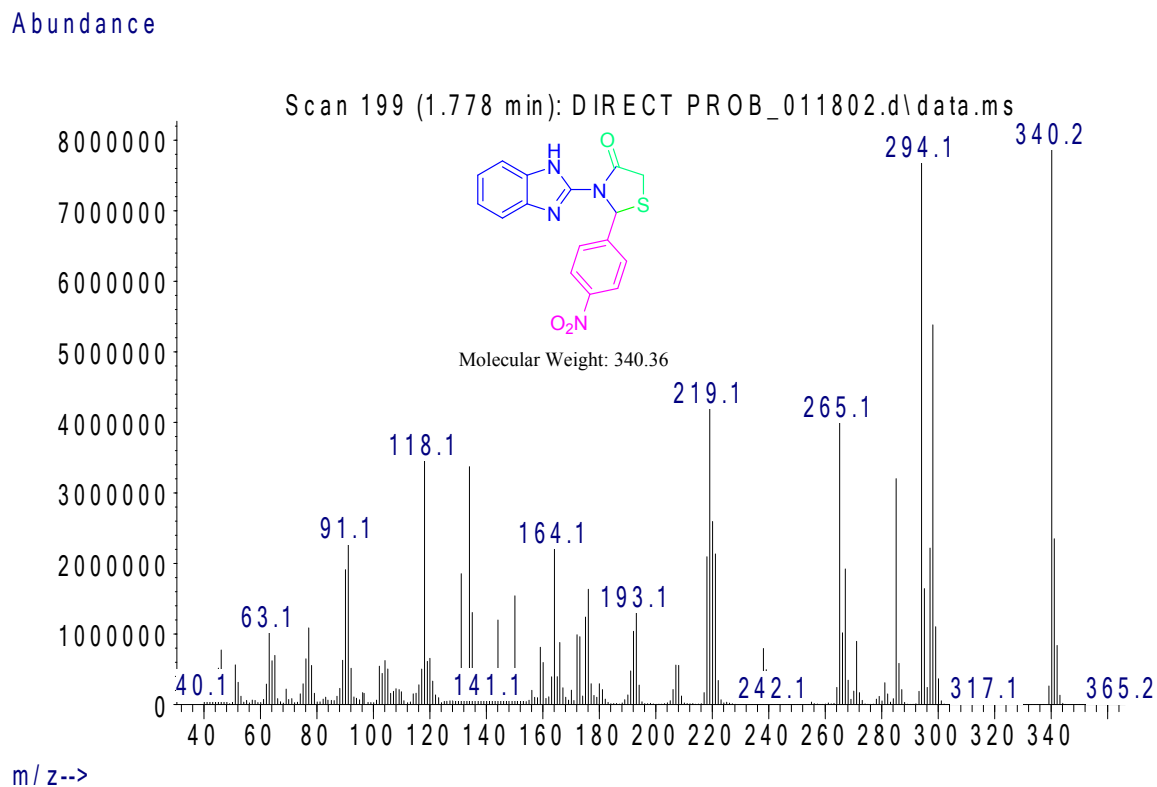

Fig. S16. The <sup>1</sup>H NMR spectrum of 3-(1H-benzo[d]imidazol-2-yl)-2-(4-bromophenyl)thiazolidin-4-one (4f)

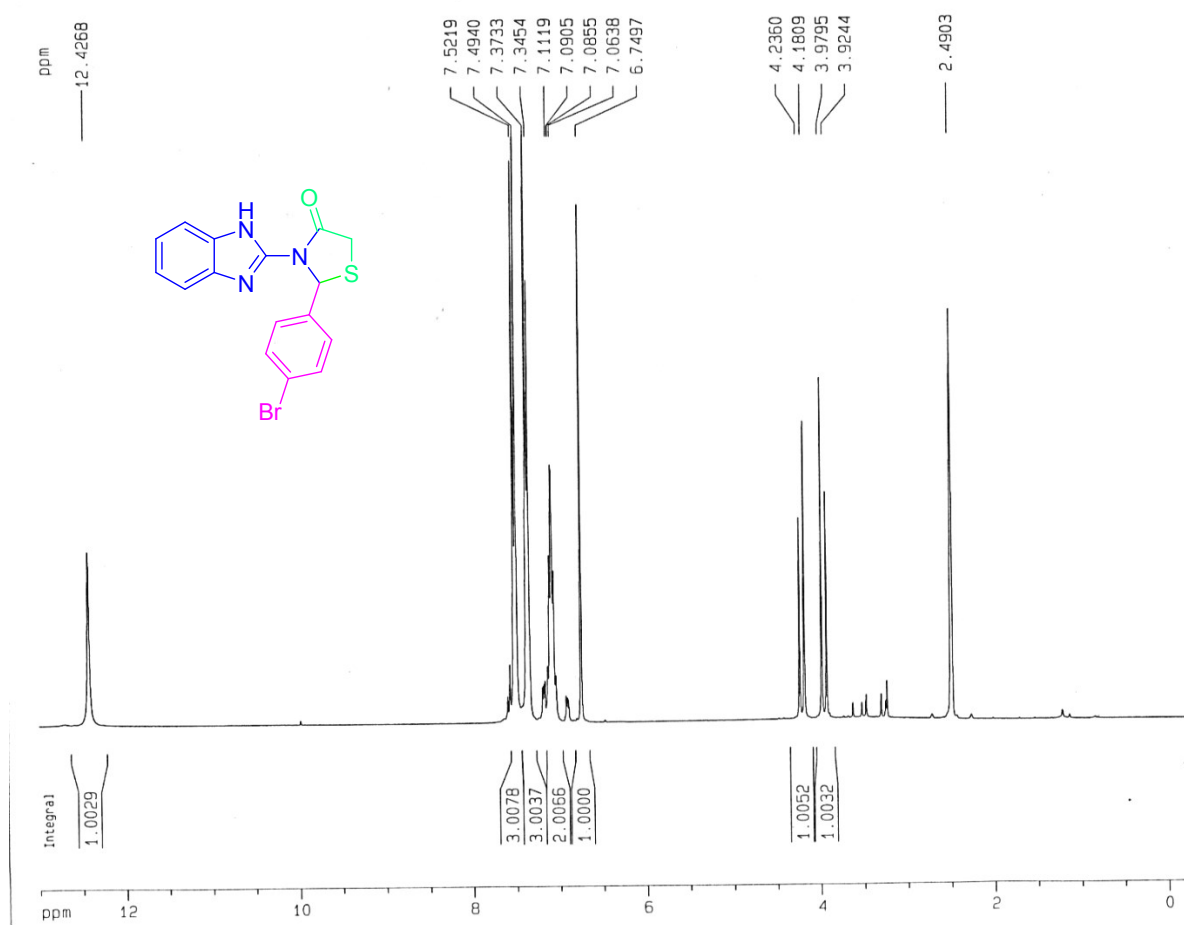

Fig. S17. The  $^{13}\text{C}$  NMR spectrum of 3-(1*H*-benzo[*d*]imidazol-2-yl)-2-(4-bromophenyl)thiazolidin-4-one (4f)

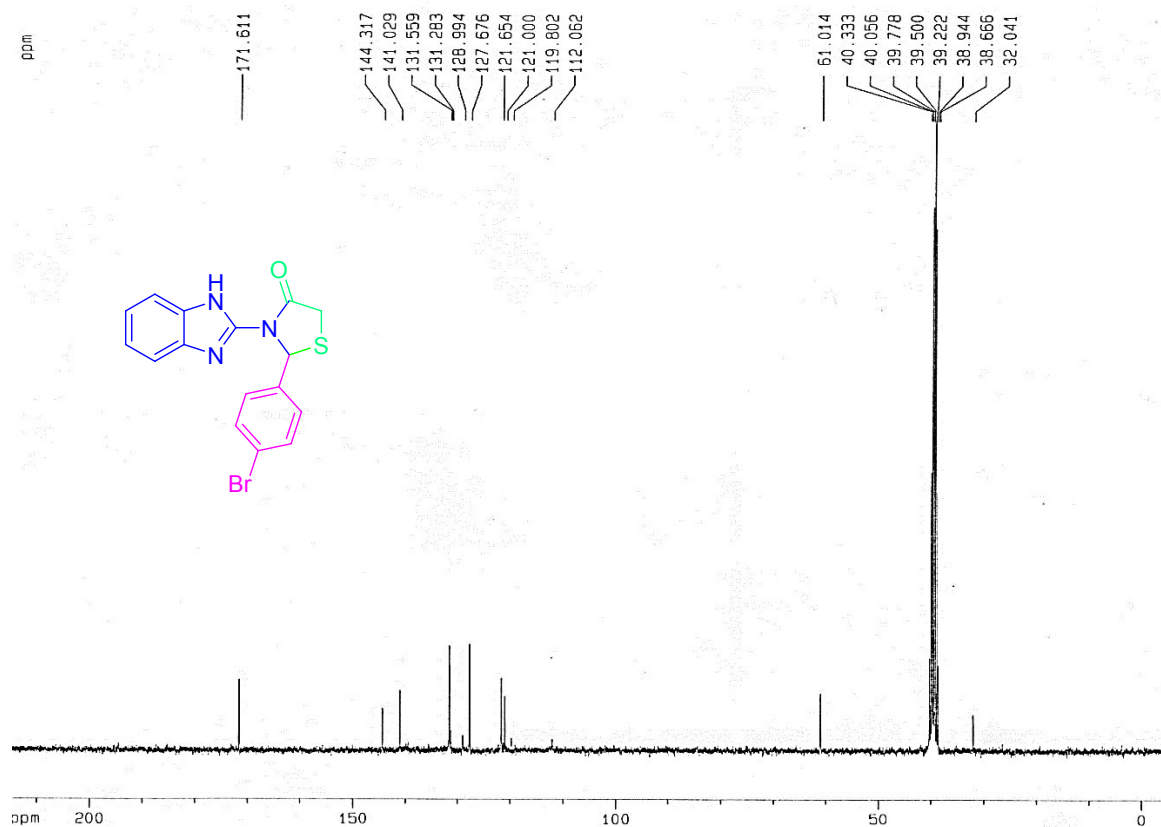

Fig. S18. The Mass spectrum of 3-(1*H*-benzo[*d*]imidazol-2-yl)-2-(4-bromophenyl)thiazolidin-4-one (4f)

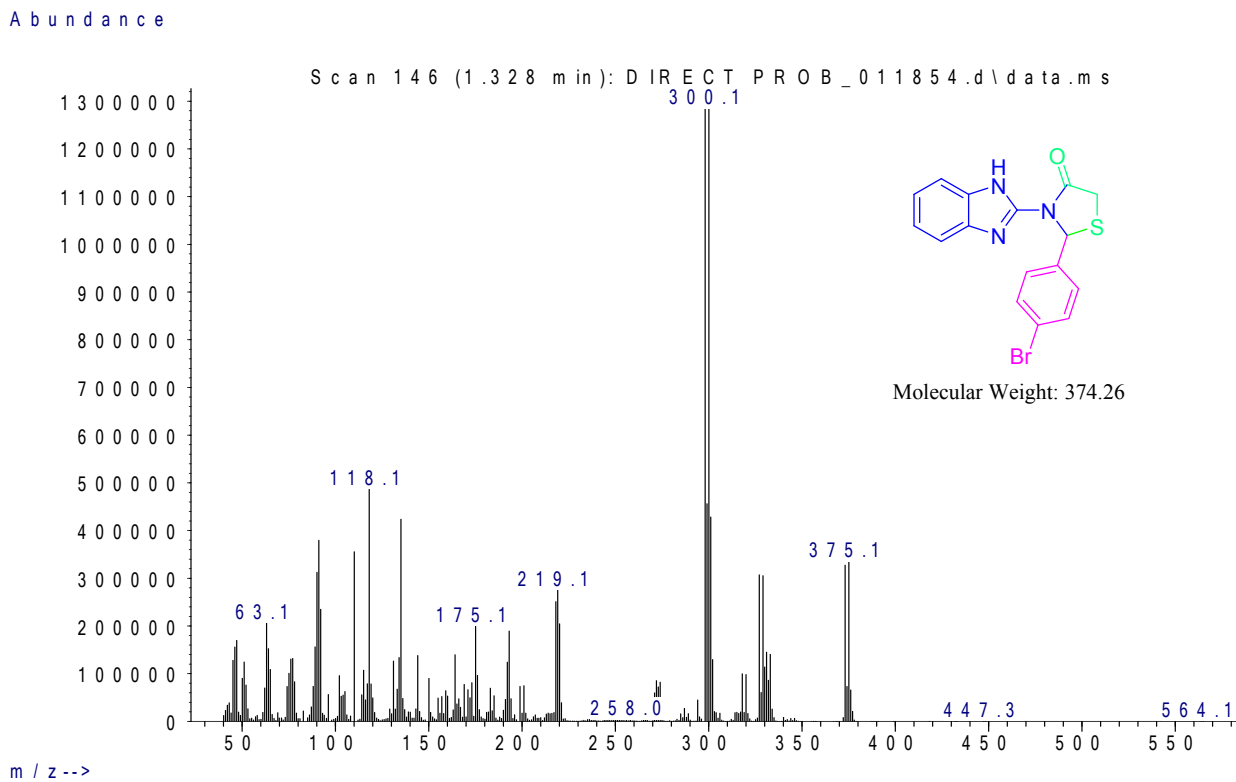

Fig. S19. The  $^1\text{H}$  NMR spectrum of 3-(1*H*-benzo[*d*]imidazol-2-yl)-2-(2-chlorophenyl)thiazolidin-4-one (4g)

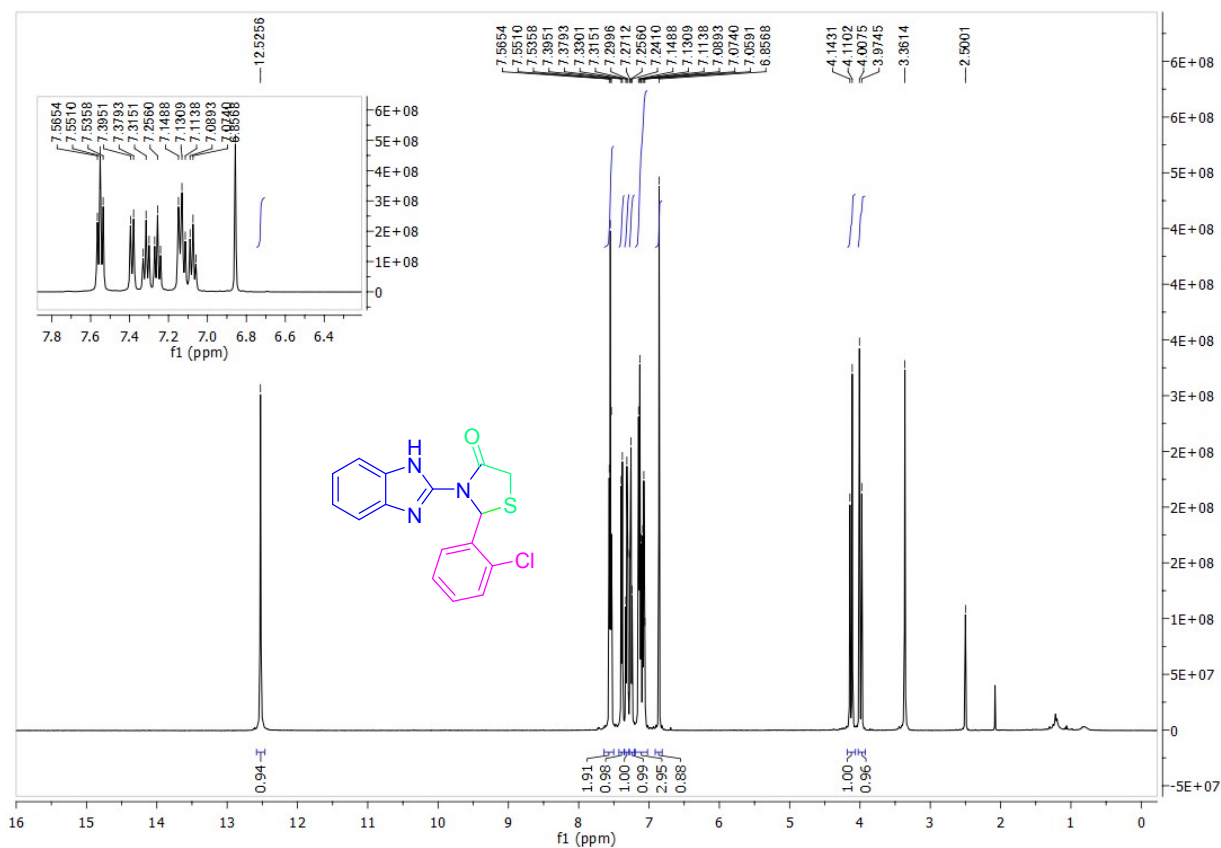

Fig. S20. The  $^{13}\text{C}$  NMR spectrum of 3-(1*H*-benzo[*d*]imidazol-2-yl)-2-(2-chlorophenyl)thiazolidin-4-one (4g)

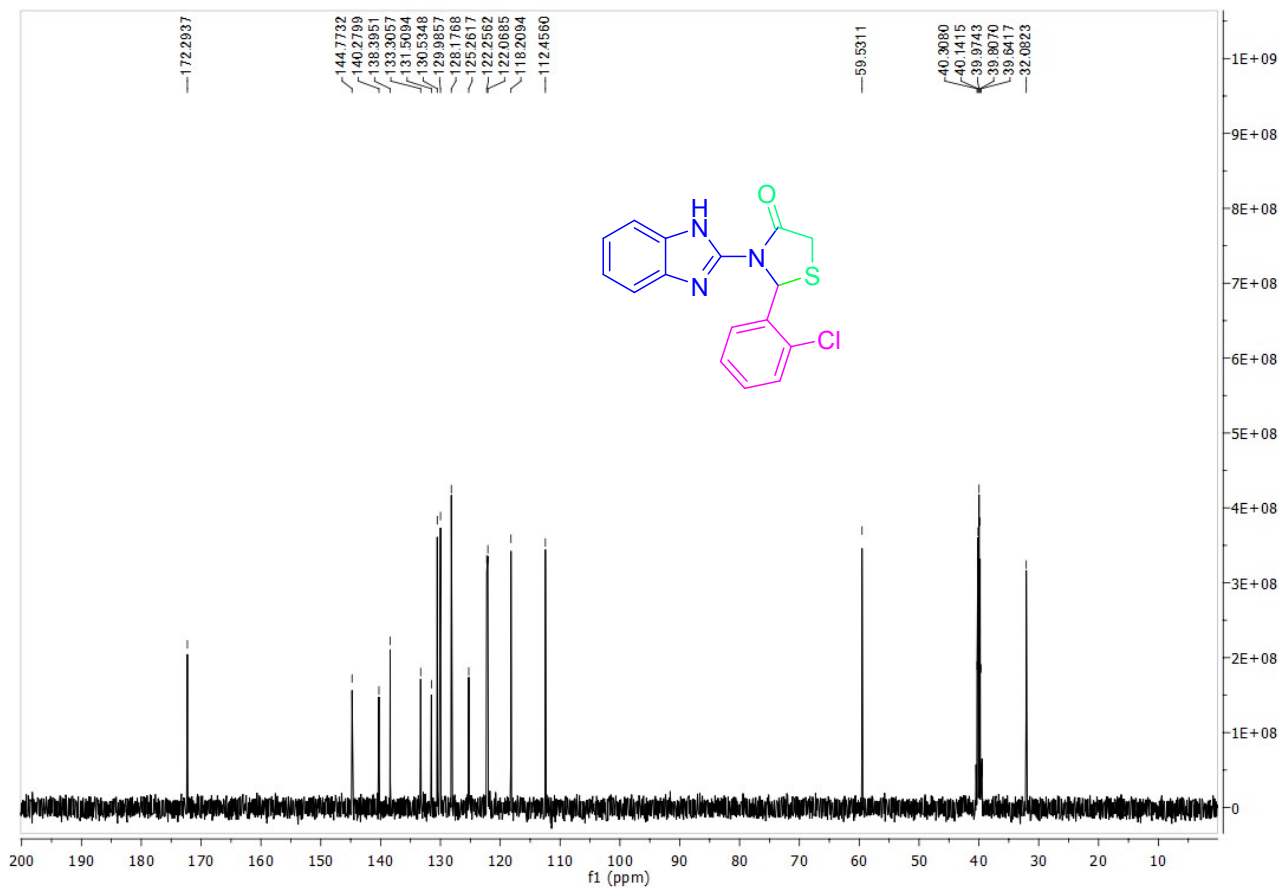

Fig. S21. The Mass spectrum of 3-(1*H*-benzo[*d*]imidazol-2-yl)-2-(2-chlorophenyl)thiazolidin-4-one (4g)

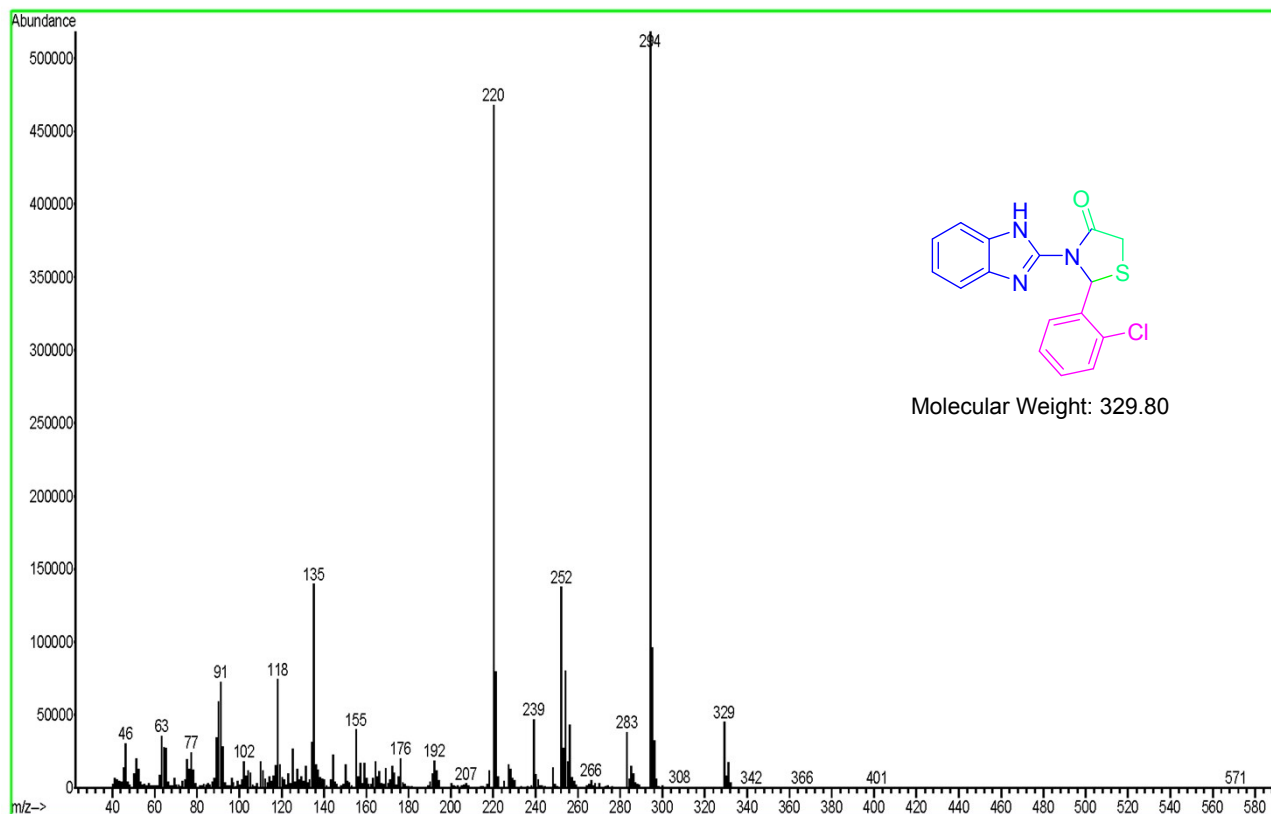

Fig. S22. The <sup>1</sup>H NMR spectrum of 3-(1*H*-benzo[*d*]imidazol-2-yl)-2-(4-methoxyphenyl)thiazolidin-4-one (4h)

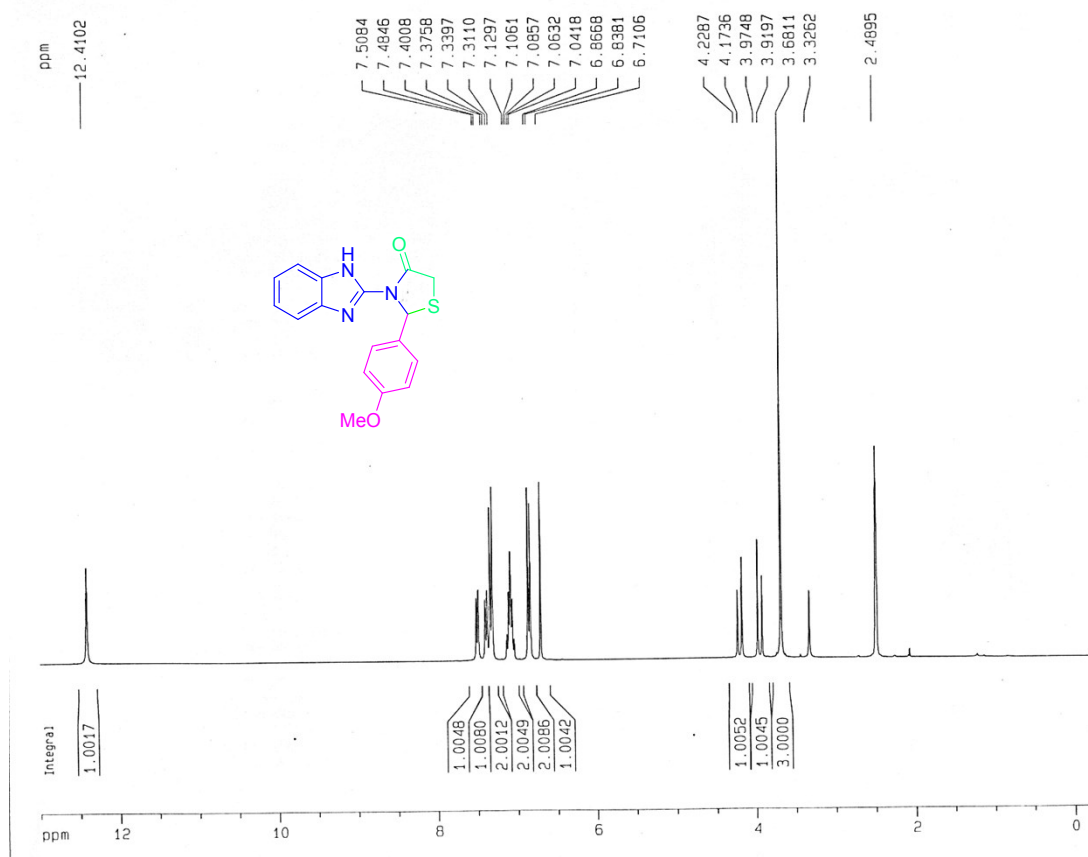



Fig. S23. The  $^{13}\text{C}$  NMR spectrum of 3-(1*H*-benzo[*d*]imidazol-2-yl)-2-(4-methoxyphenyl)thiazolidin-4-one (4h)

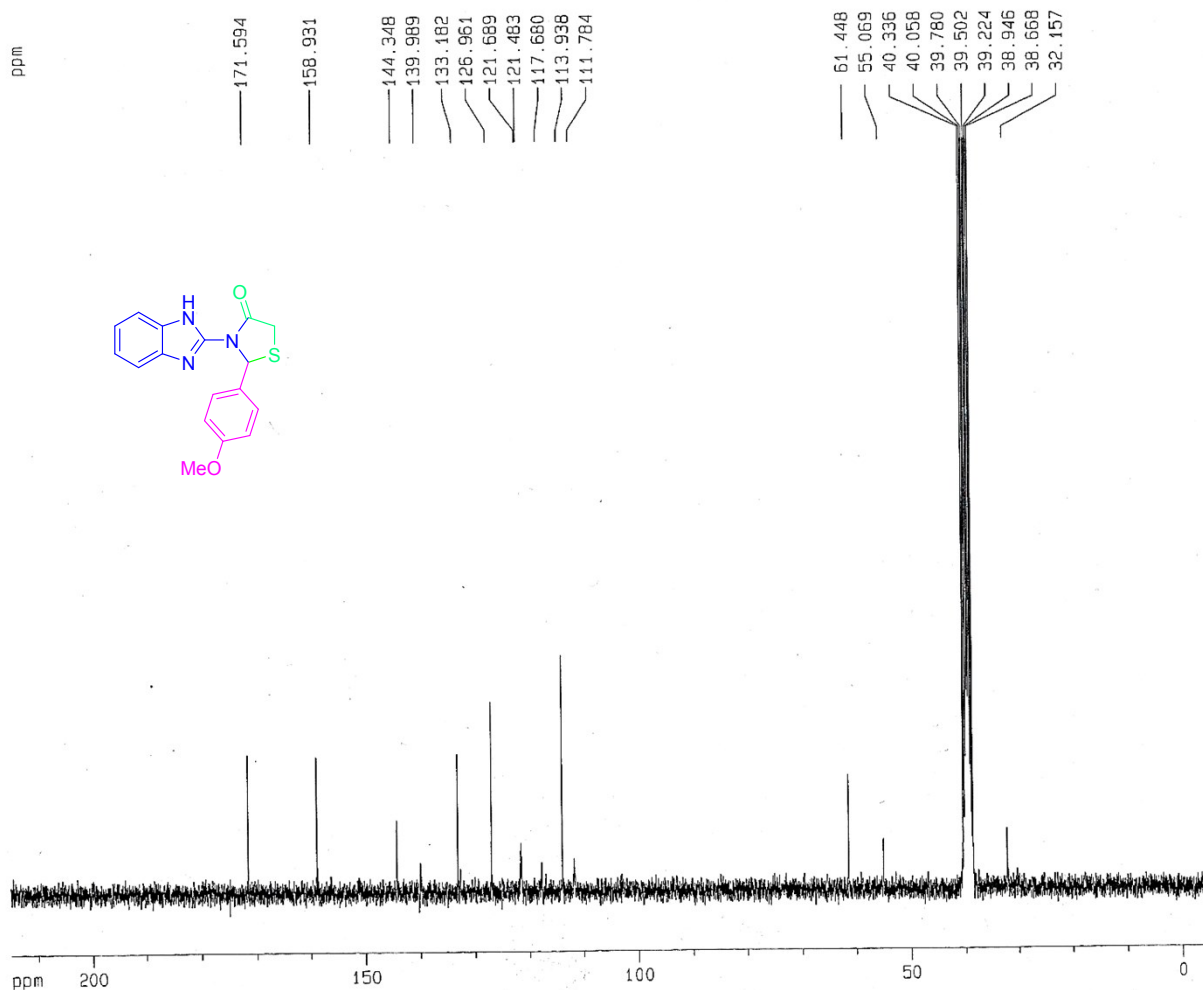

Fig. S24. The Mass spectrum of 3-(1*H*-benzo[*d*]imidazol-2-yl)-2-(4-methoxyphenyl)thiazolidin-4-one (4h)

Abundance

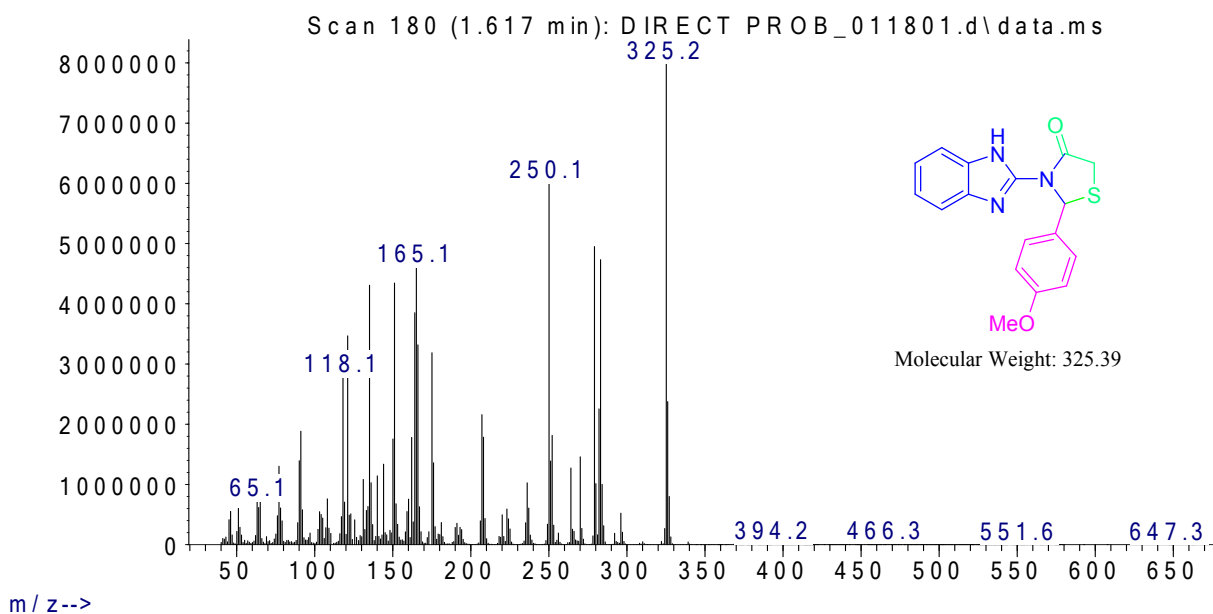

Fig. S25. The  $^1\text{H}$  NMR spectrum of 3-(1*H*-benzo[*d*]imidazol-2-yl)-2-(*p*-tolyl) thiazolidin-4-one (4i)

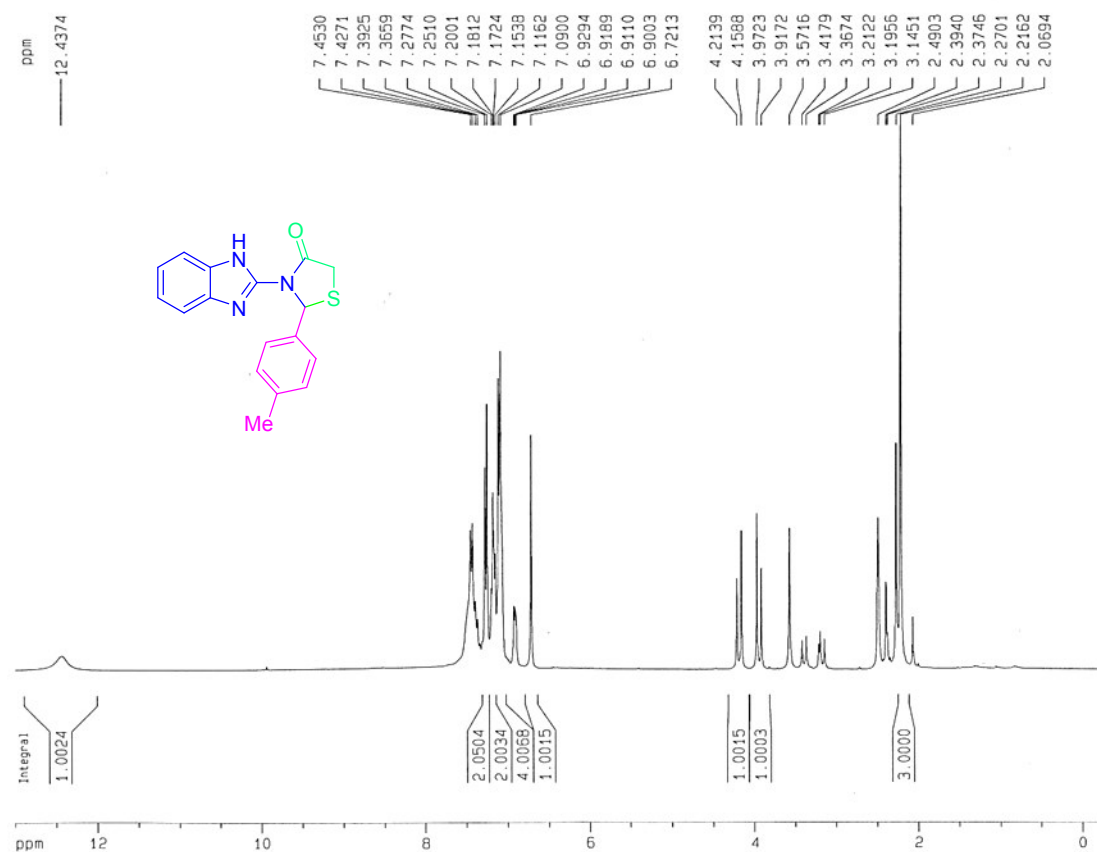

Fig. S26. The  $^{13}\text{C}$  NMR spectrum of 3-(1*H*-benzo[*d*]imidazol-2-yl)-2-(*p*-tolyl) thiazolidin-4-one (4i)

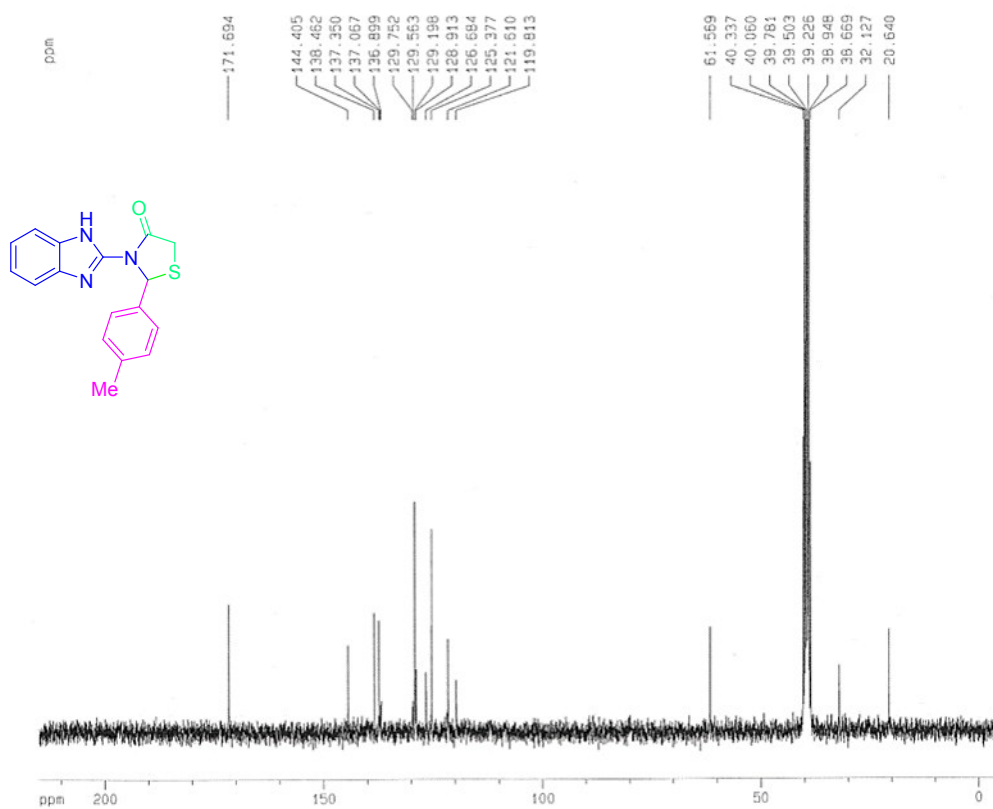

Fig. S27. The Mass spectrum of 3-(1*H*-benzo[*d*]imidazol-2-yl)-2-(*p*-tolyl) thiazolidin-4-one (4i)

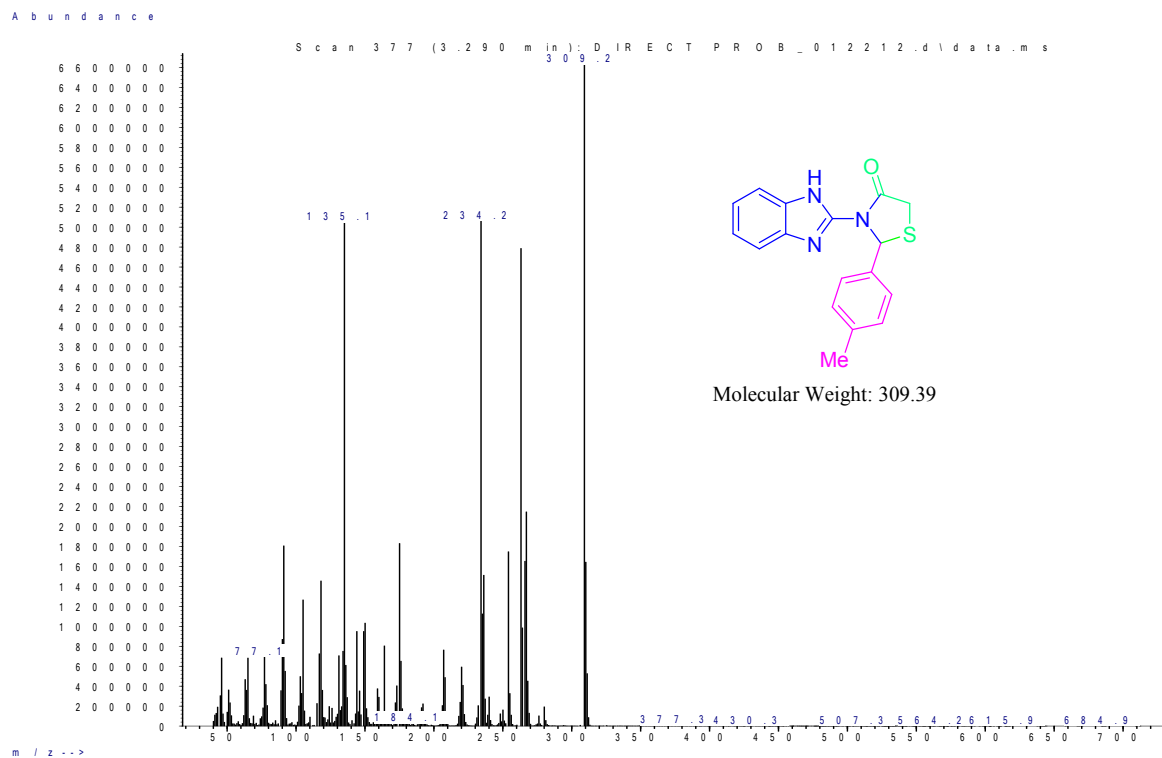

Fig. S28. The <sup>1</sup>H NMR spectrum of 3-(1*H*-benzo[*d*]imidazol-2-yl)-2-(3,4-dimethoxyphenyl)thiazolidin-4-one (4j)

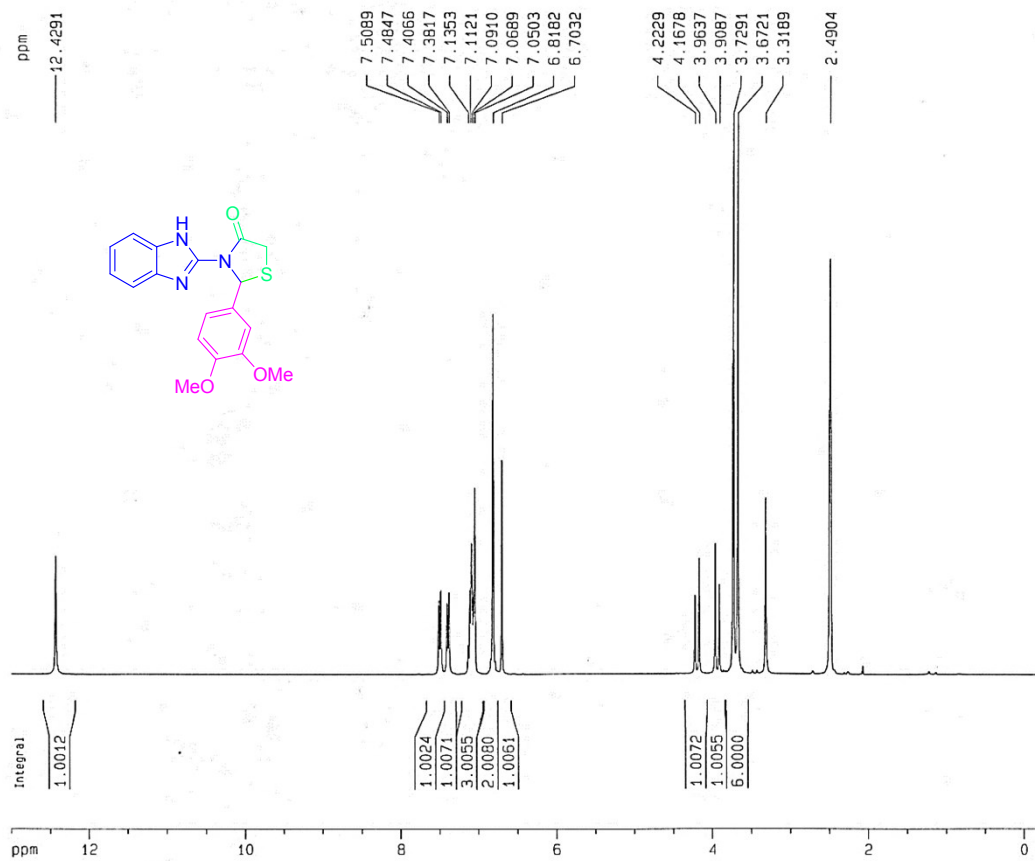

Fig. S29. The  $^{13}\text{C}$  NMR spectrum of 3-(1*H*-benzo[*d*]imidazol-2-yl)-2-(3,4-dimethoxyphenyl)thiazolidin-4-one (4j)

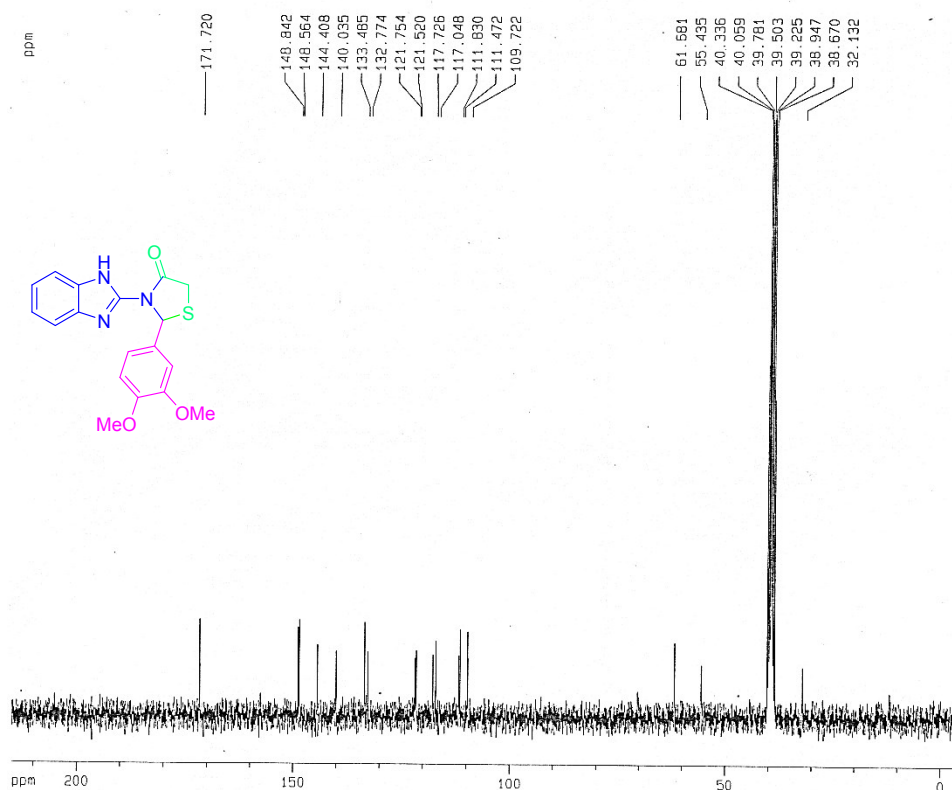

Fig. S30. The Mass spectrum of 3-(1*H*-benzo[*d*]imidazol-2-yl)-2-(3,4-dimethoxyphenyl)thiazolidin-4-one (4j)

Abundance

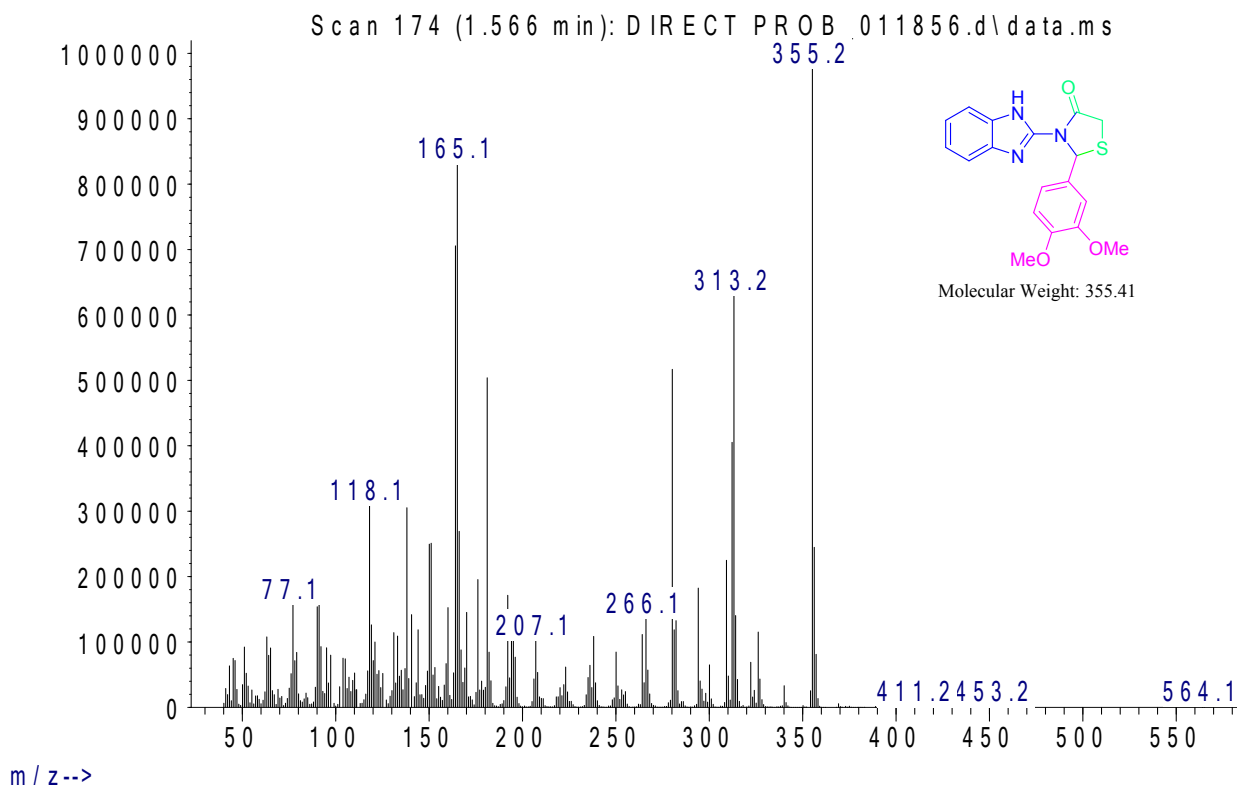

Fig. S31. The <sup>1</sup>H NMR spectrum of 3-(benzo[d]thiazol-2-yl)-2-(2-hydroxyphenyl)thiazolidin-4-one (4k)

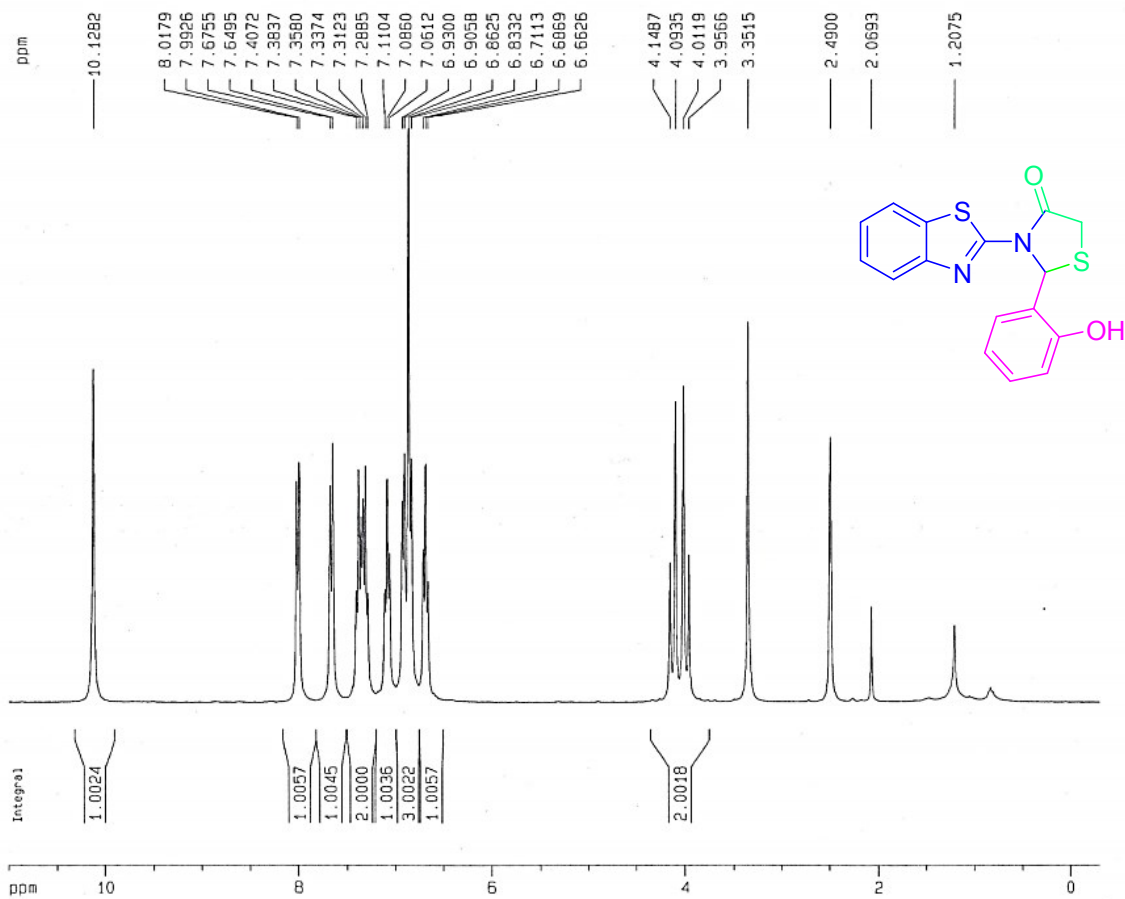

Fig. S32. The <sup>13</sup>C NMR spectrum of 3-(benzo[d]thiazol-2-yl)-2-(2-hydroxyphenyl)thiazolidin-4-one (4k)

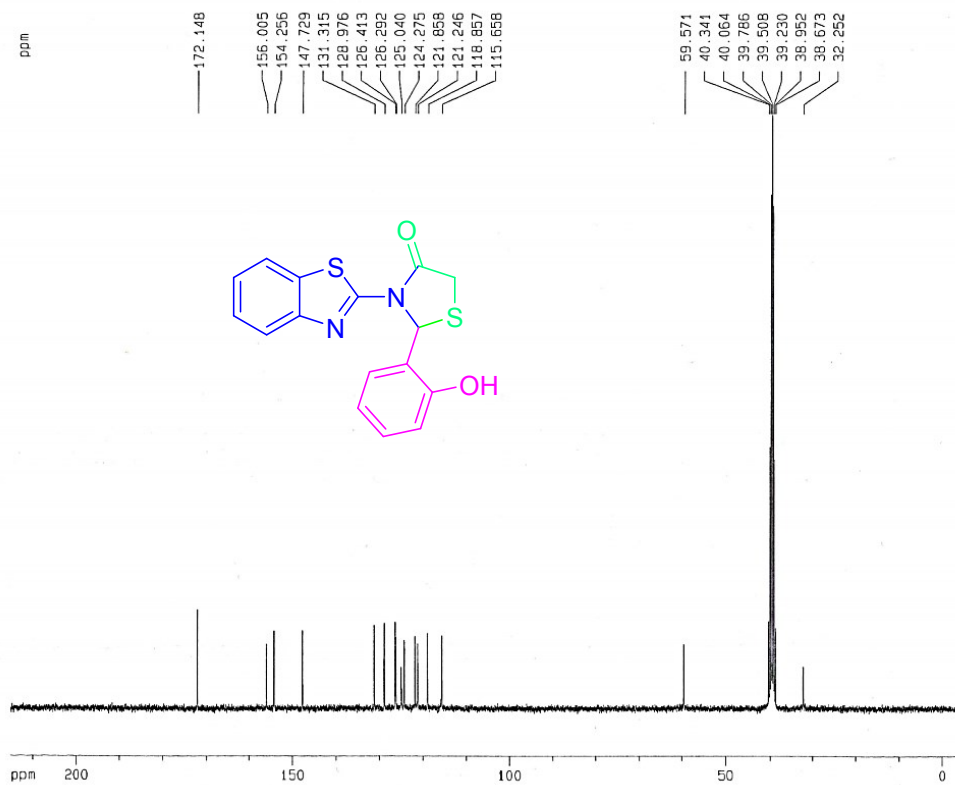

Fig. S33. The Mass spectrum of 3-(benzo[d]thiazol-2-yl)-2-(2-hydroxyphenyl)thiazolidin-4-one (4k)

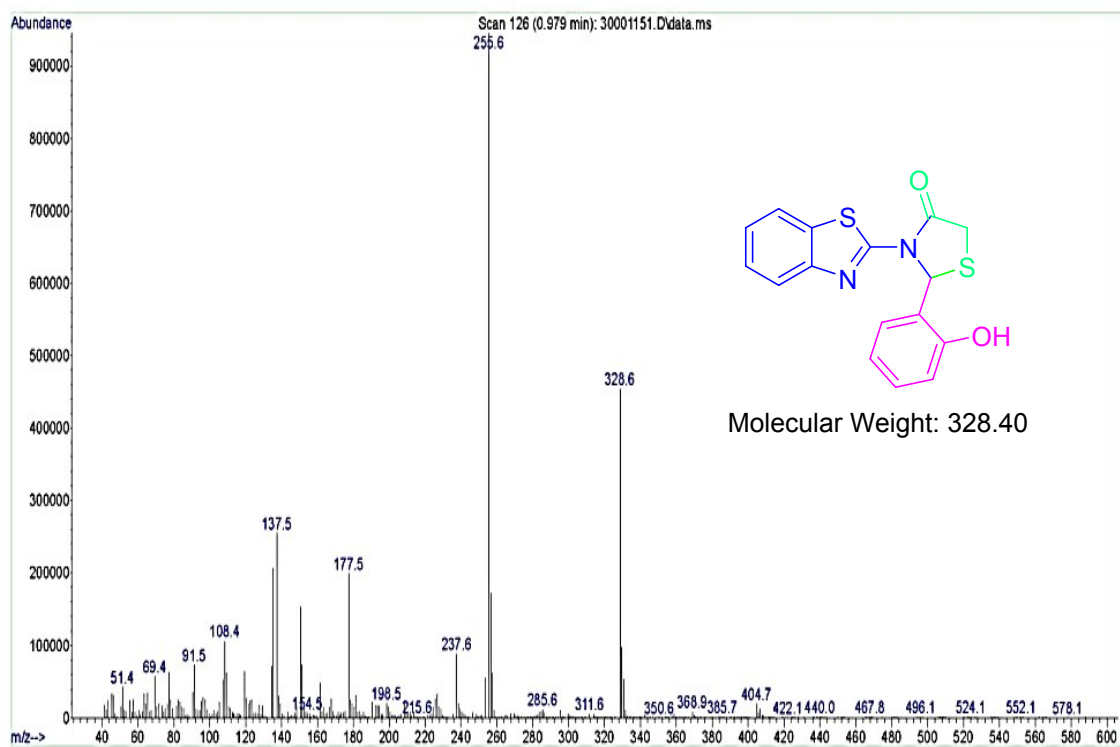

Fig. S34. The <sup>1</sup>H NMR spectrum of 3-(Benzo[d]thiazol-2-yl)-2-(3-nitrophenyl)thiazolidin-4-one (4l)

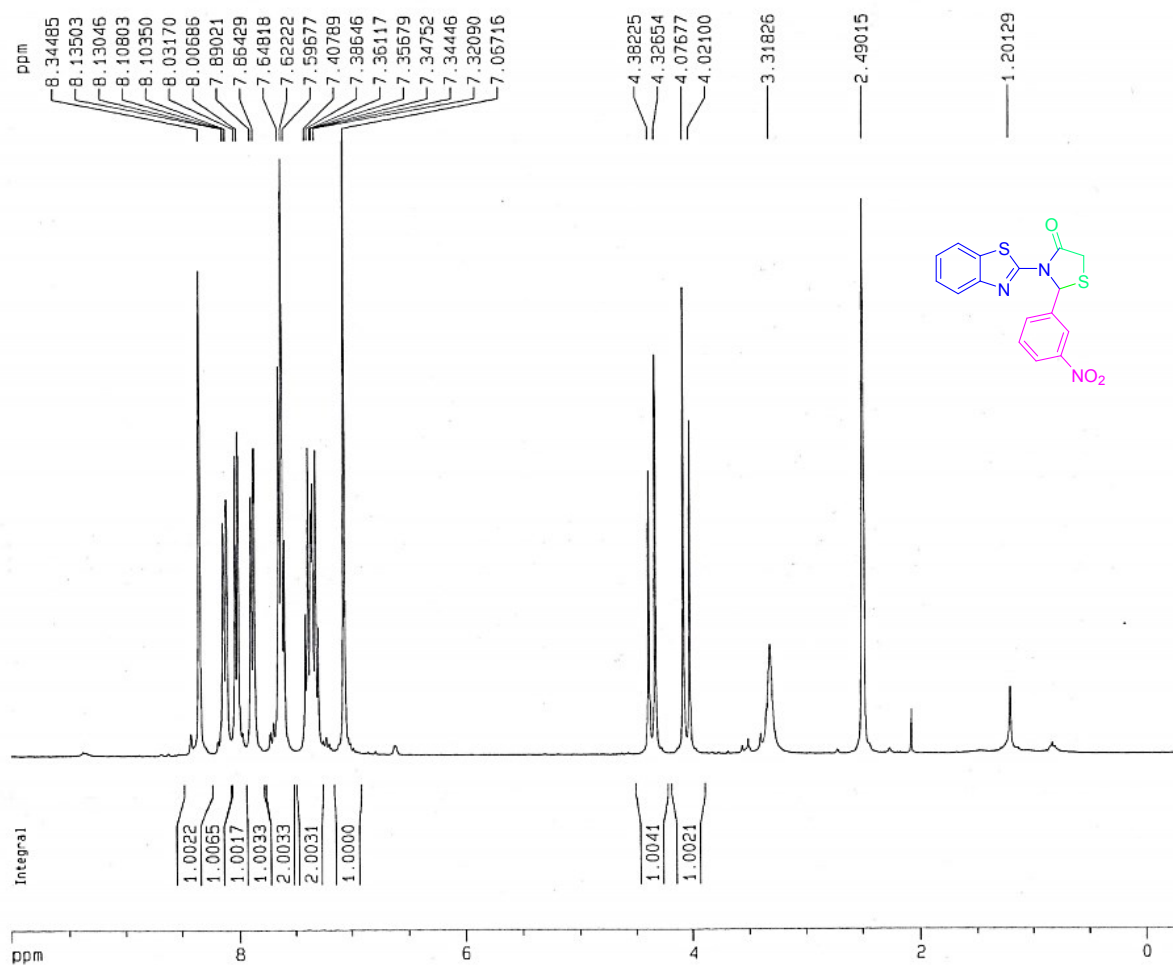

Fig. S35. The  $^{13}\text{C}$  NMR spectrum of 3-(Benzo[d]thiazol-2-yl)-2-(3-nitrophenyl)thiazolidin-4-one (4I)

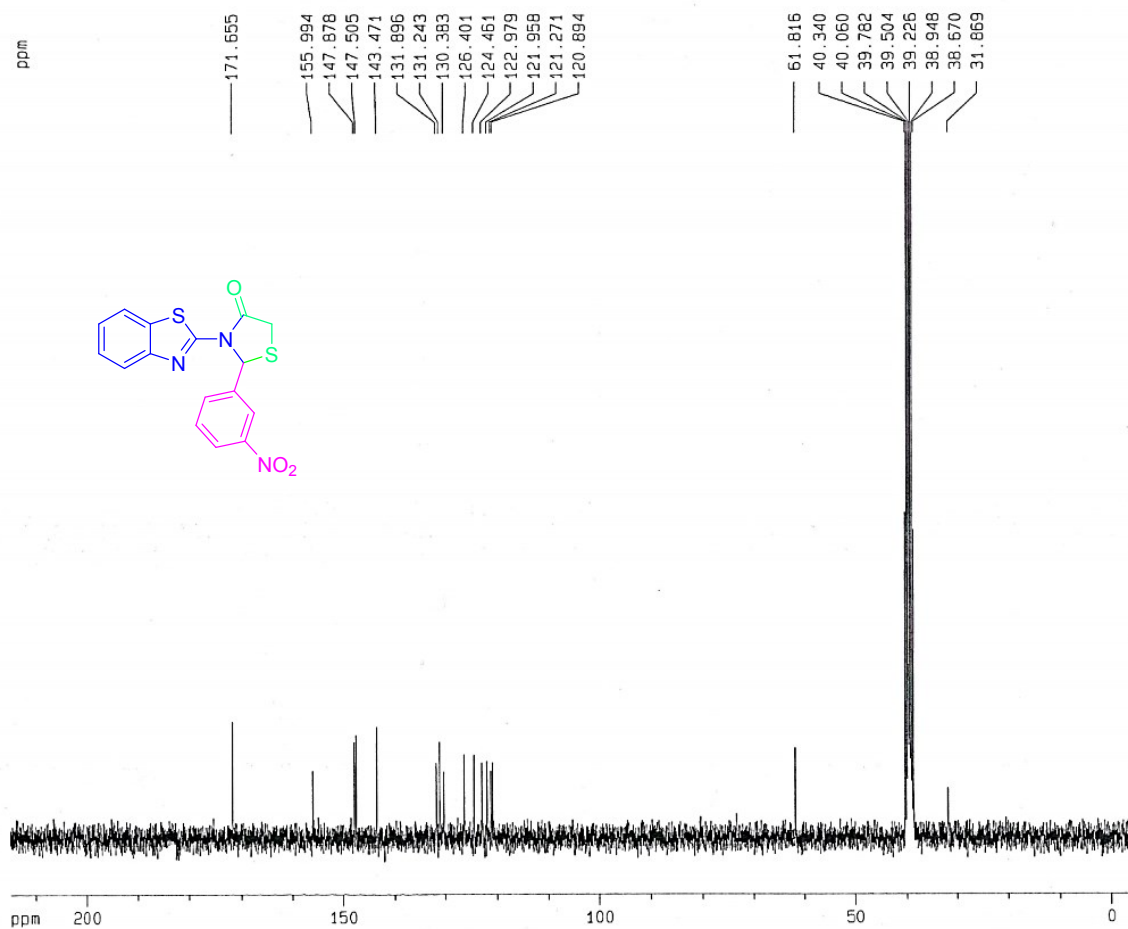

Fig. S36. The Mass spectrum of 3-(Benzo[d]thiazol-2-yl)-2-(3-nitrophenyl)thiazolidin-4-one (4I)

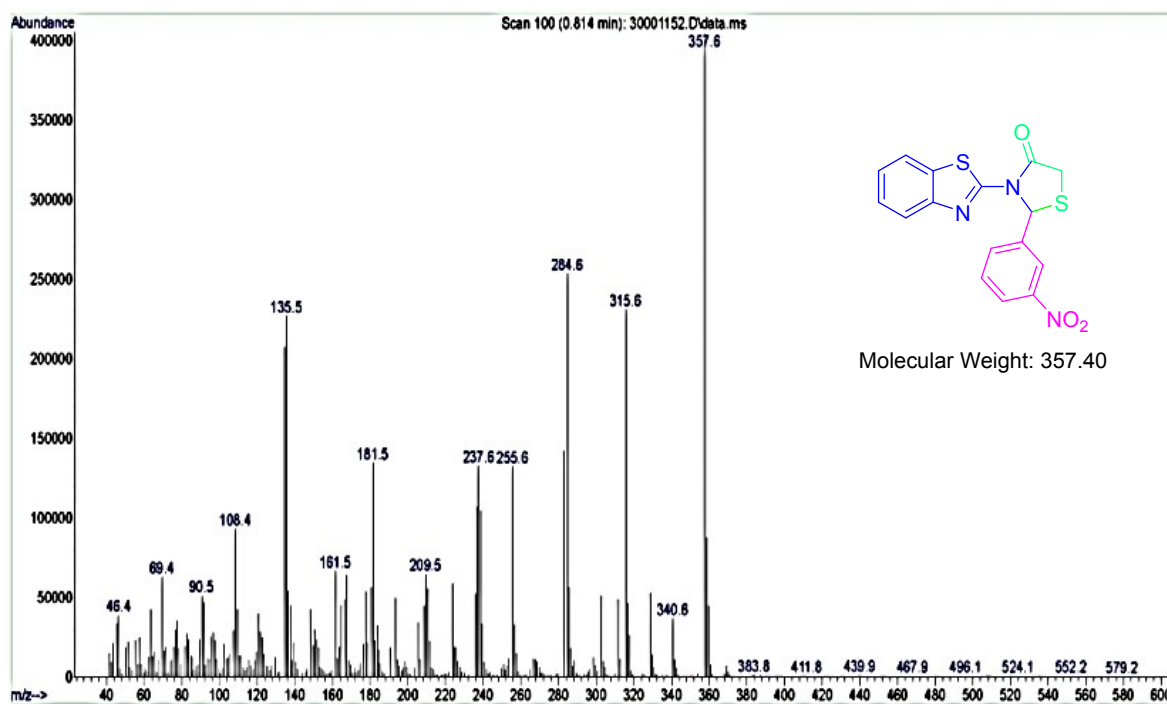

Fig. S37. The <sup>1</sup>H NMR spectrum of 3-(Benzo[d]thiazol-2-yl)-2-(4-nitrophenyl)thiazolidin-4-one (4m)

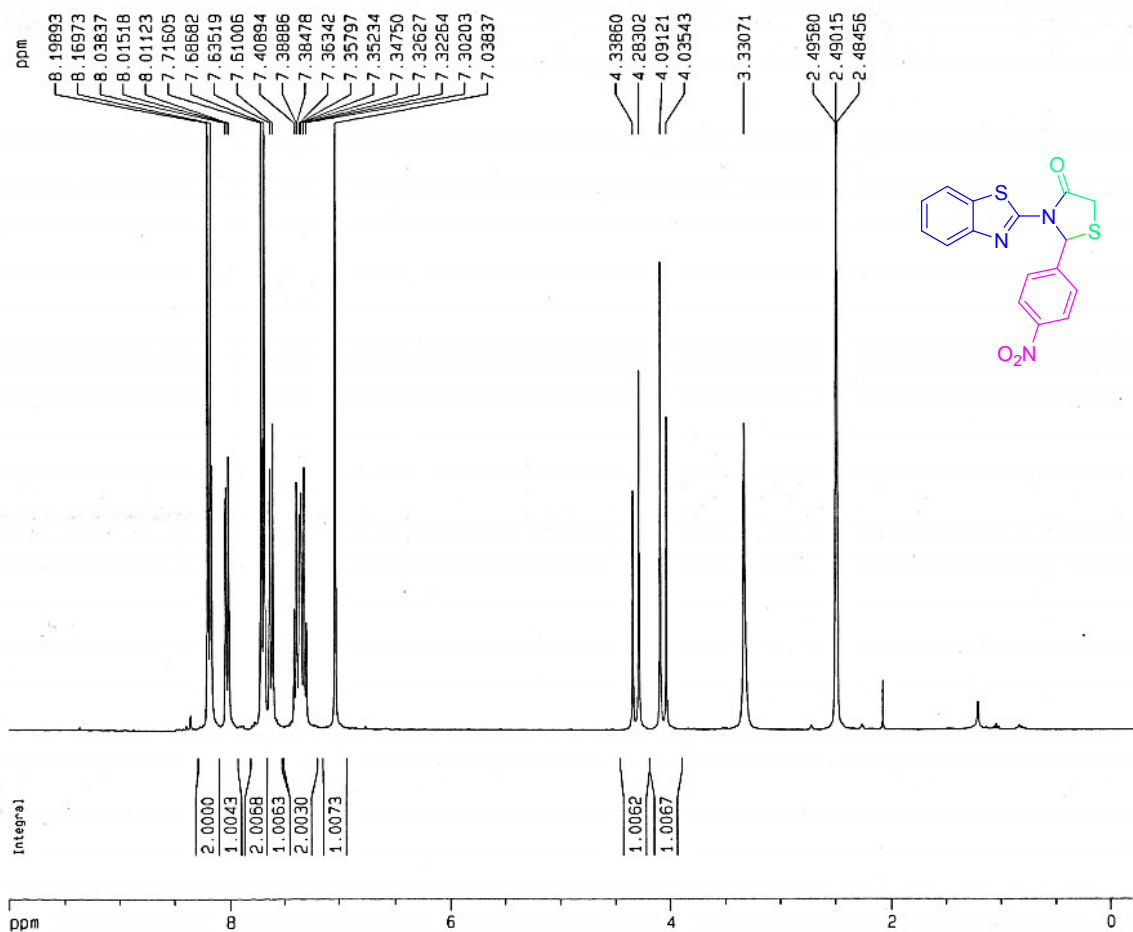

Fig. S38. The <sup>13</sup>C NMR spectrum of 3-(Benzo[d]thiazol-2-yl)-2-(4-nitrophenyl)thiazolidin-4-one (4m)

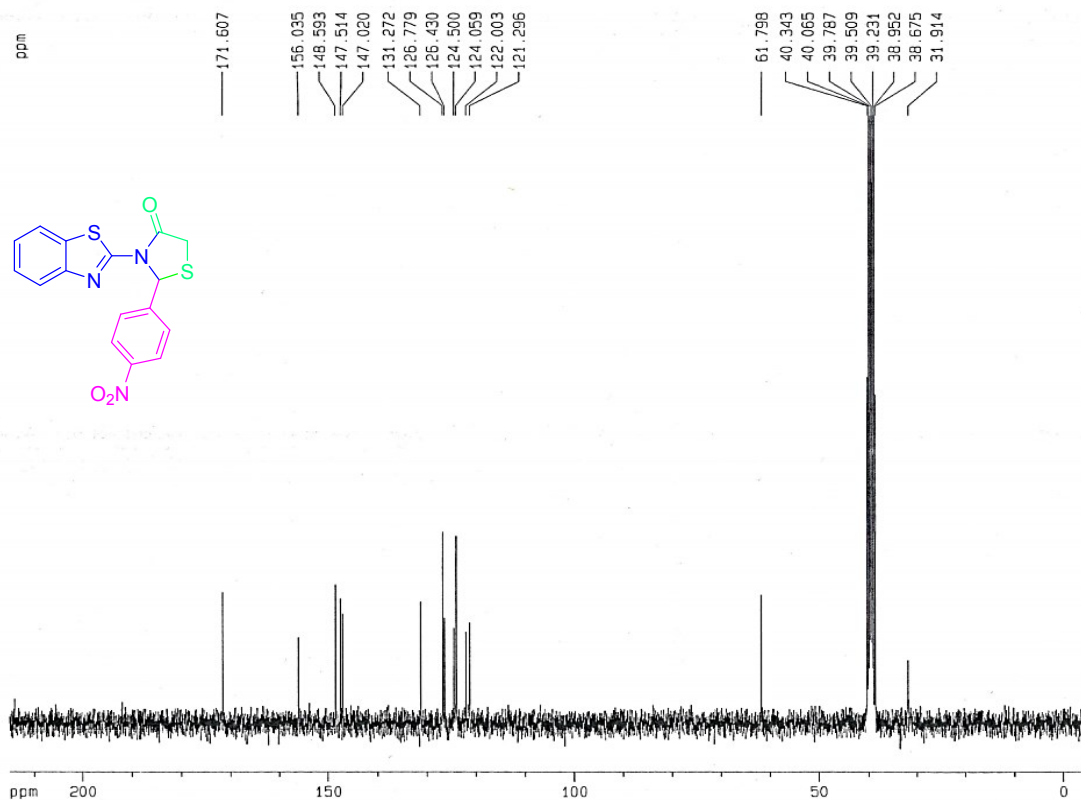



Fig. S39. The Mass spectrum of 3-(Benzo[d]thiazol-2-yl)-2-(4-nitrophenyl)thiazolidin-4-one (4m)

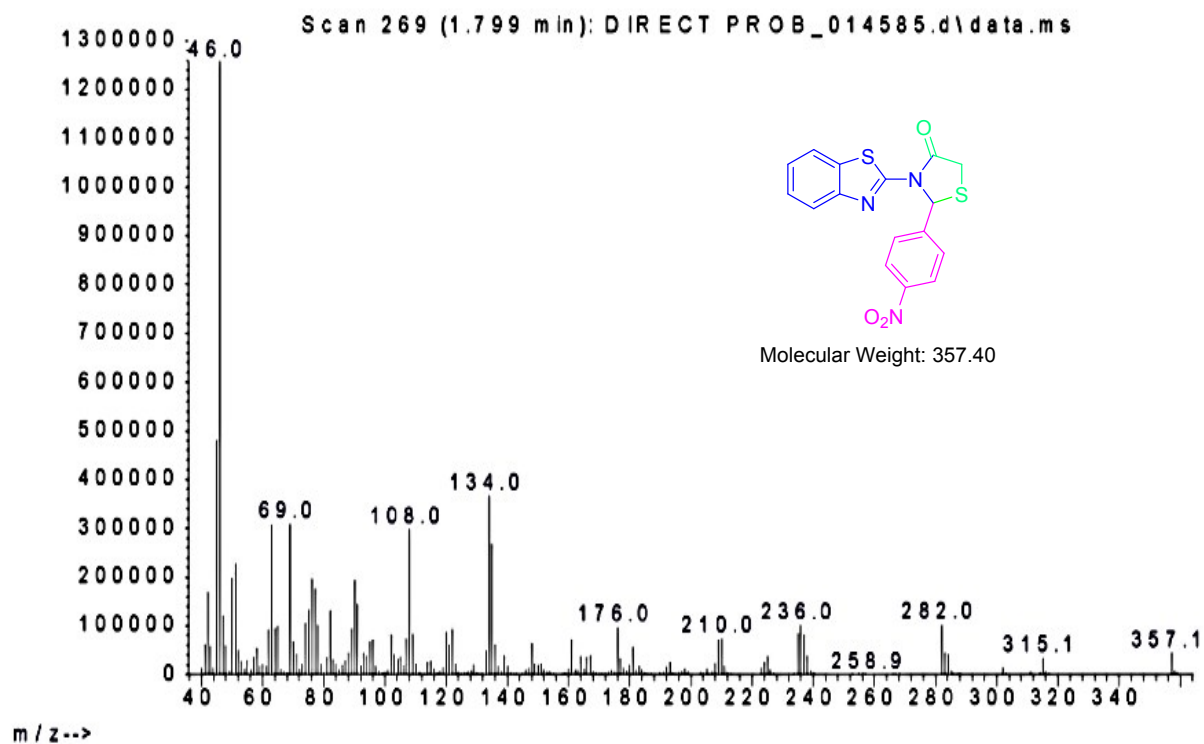

Fig. S40. The <sup>1</sup>H NMR spectrum of 3-(Benzo[d]thiazol-2-yl)-2-(4-bromophenyl)thiazolidin-4-one (4n)

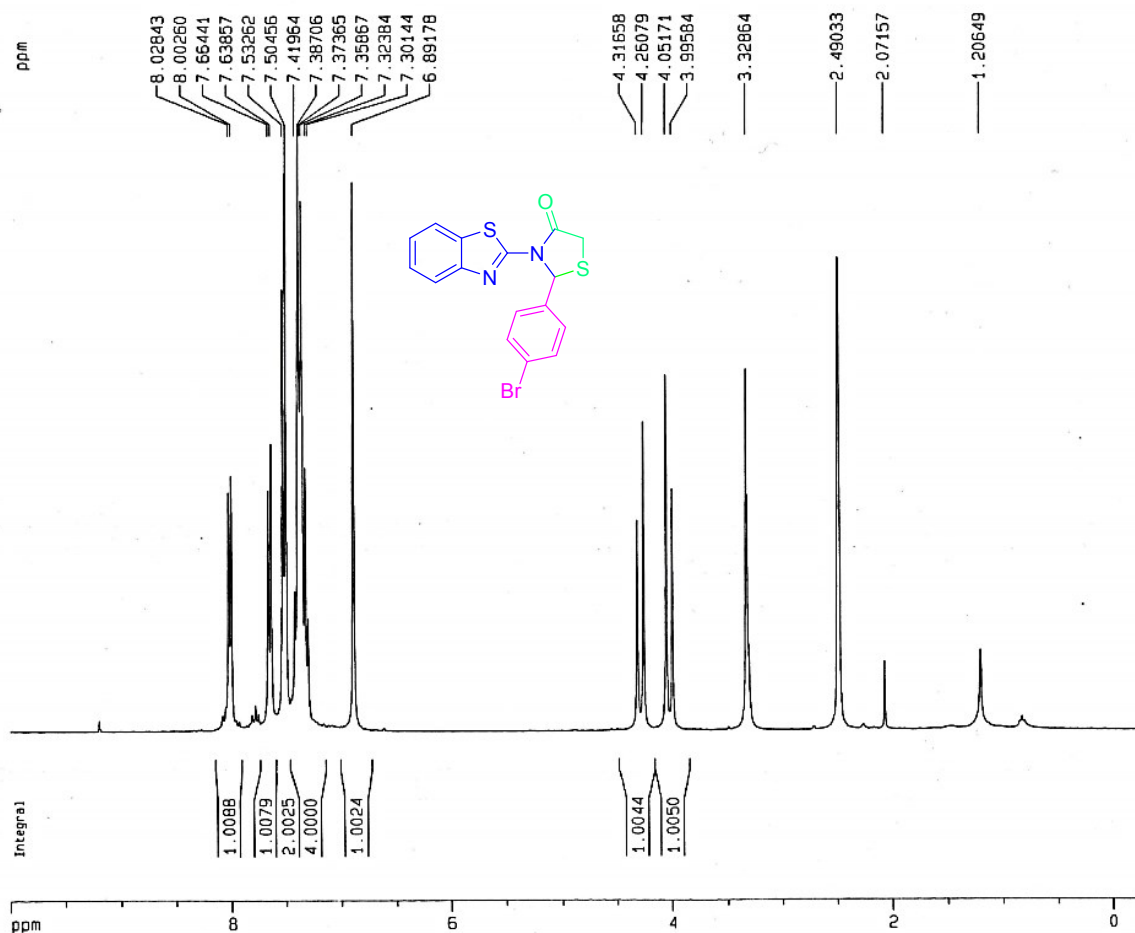

Fig. S41. The  $^{13}\text{C}$  NMR spectrum of 3-(Benzo[d]thiazol-2-yl)-2-(4-bromophenyl)thiazolidin-4-one (4n)

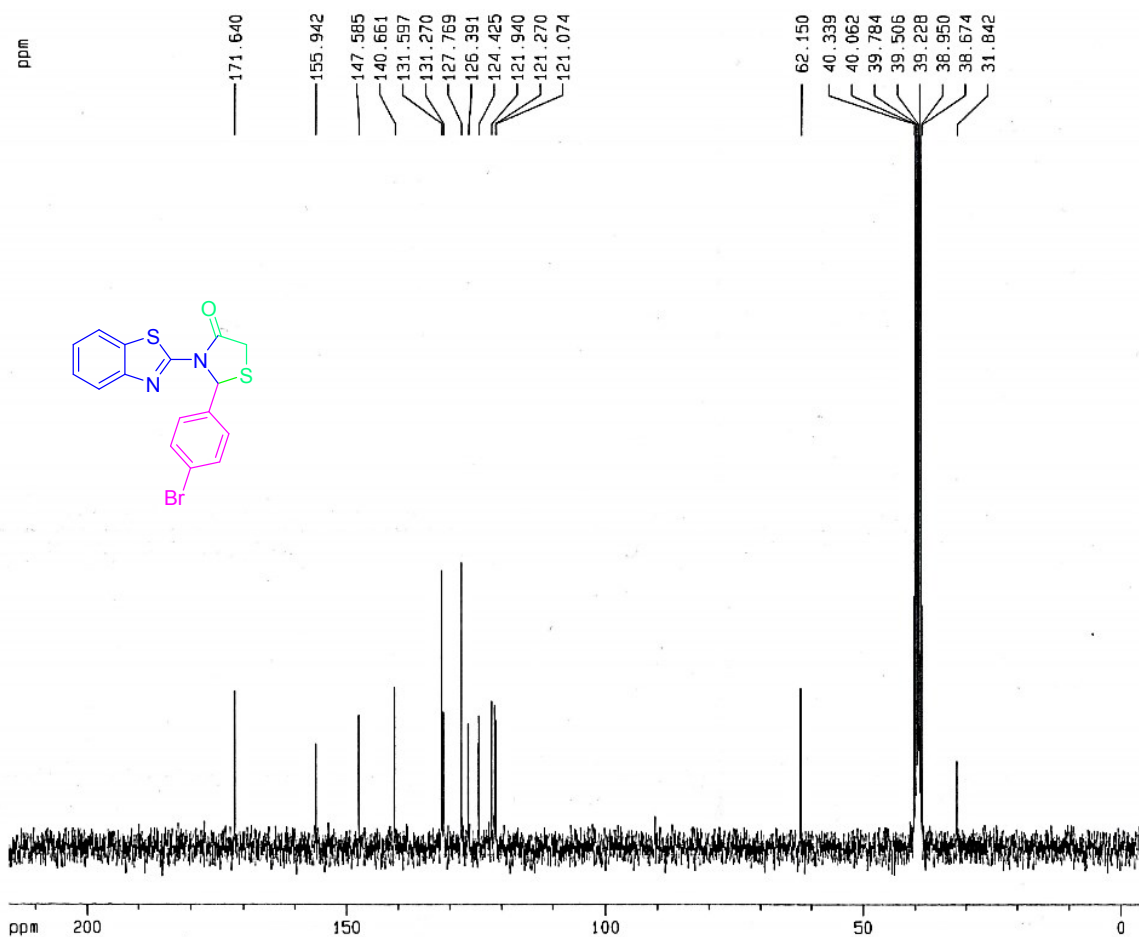

Fig. S42. The Mass spectrum of 3-(Benzo[d]thiazol-2-yl)-2-(4-bromophenyl)thiazolidin-4-one (4n)

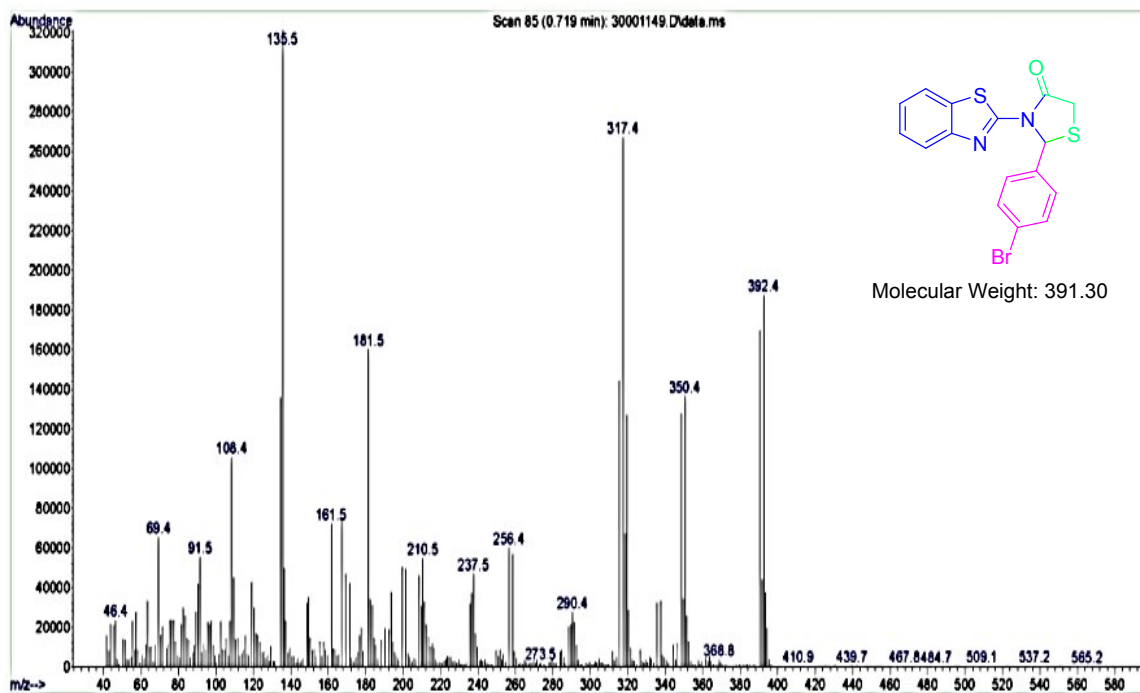

Fig. S43. The  $^1\text{H}$  NMR spectrum of 3-(Benzo[*d*]thiazol-2-yl)-2-(4-methoxyphenyl)thiazolidin-4-one (4o)

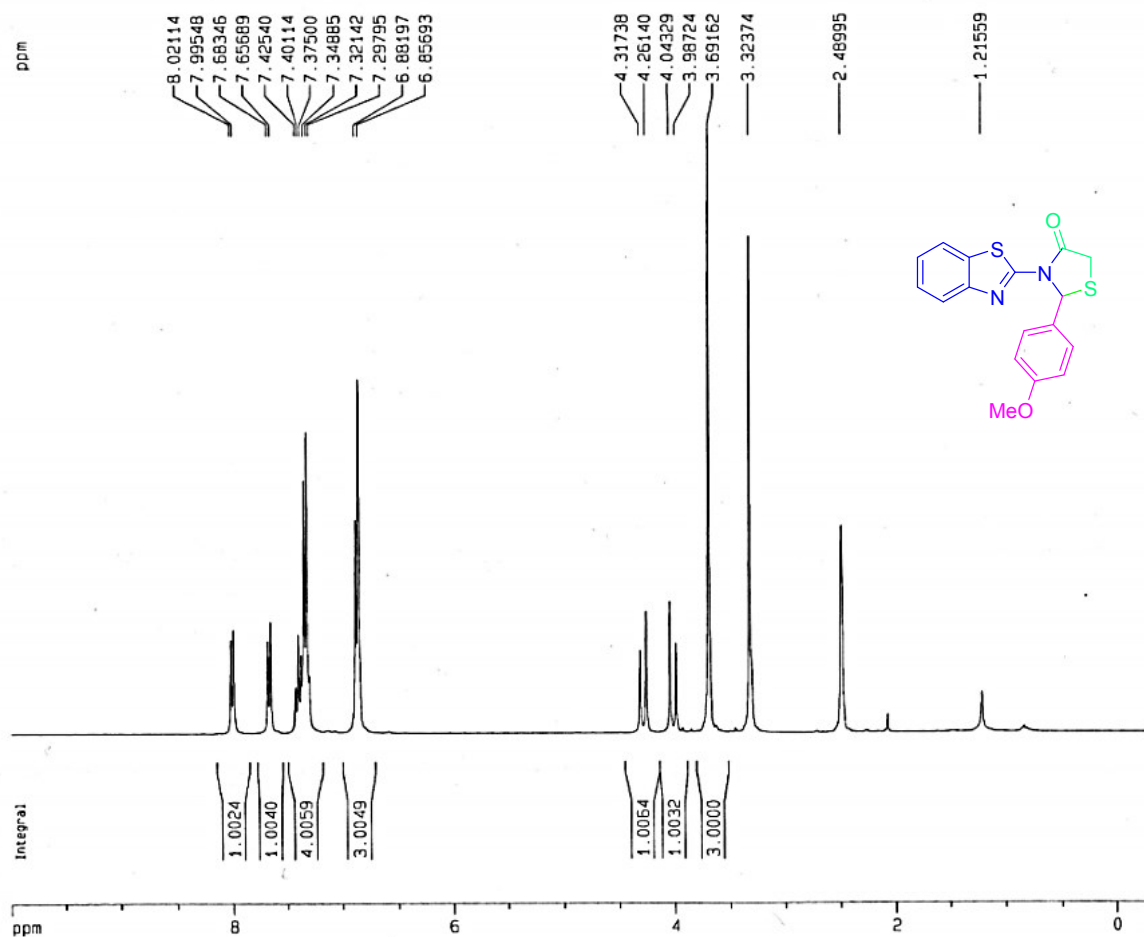

Fig. S44. The  $^{13}\text{C}$  NMR spectrum of 3-(Benzo[*d*]thiazol-2-yl)-2-(4-methoxyphenyl)thiazolidin-4-one (4o)

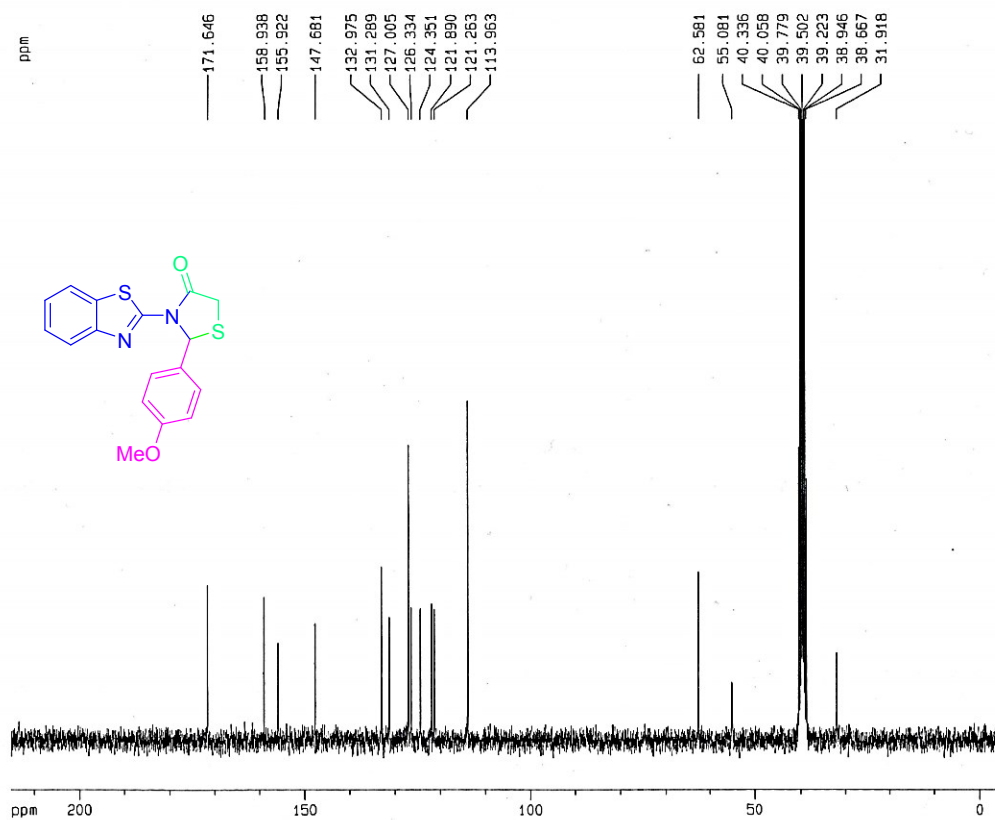

Fig. S45. The Mass spectrum of 3-(Benzo[d]thiazol-2-yl)-2-(4-methoxyphenyl)thiazolidin-4-one (4o)

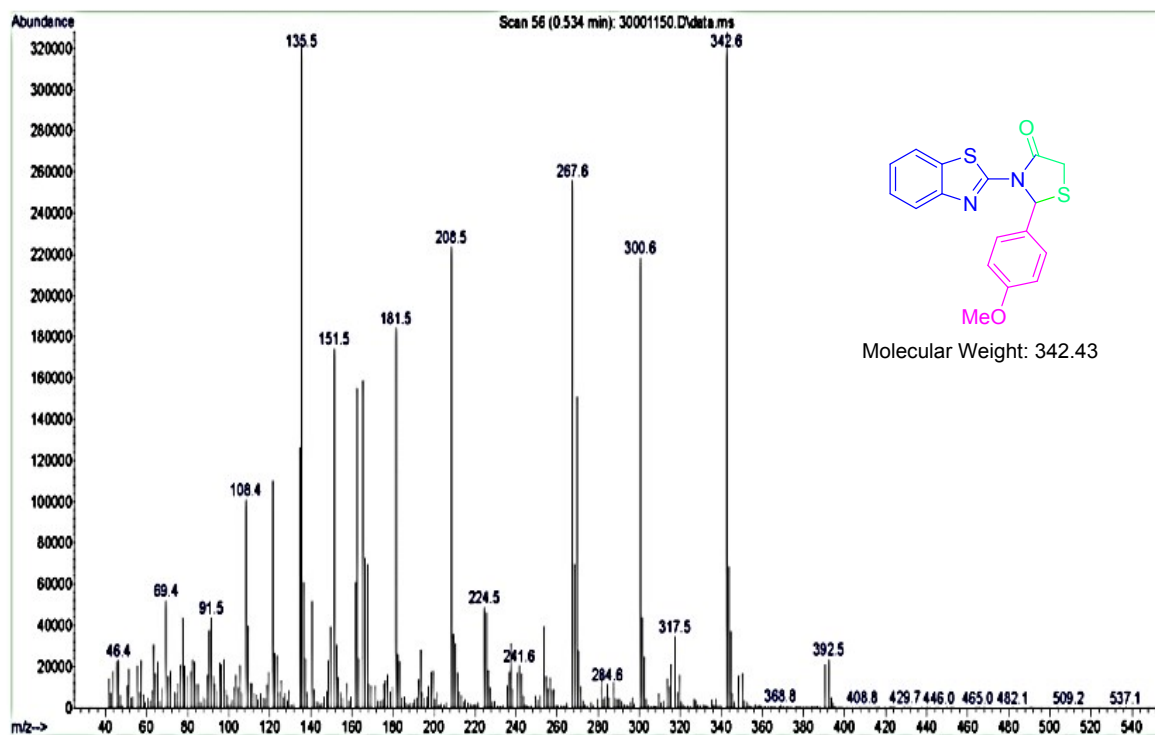

Fig. S46. The <sup>1</sup>H NMR spectrum of 3-(Benzo[d]thiazol-2-yl)-2-(4-methylphenyl)thiazolidin-4-one (4p)

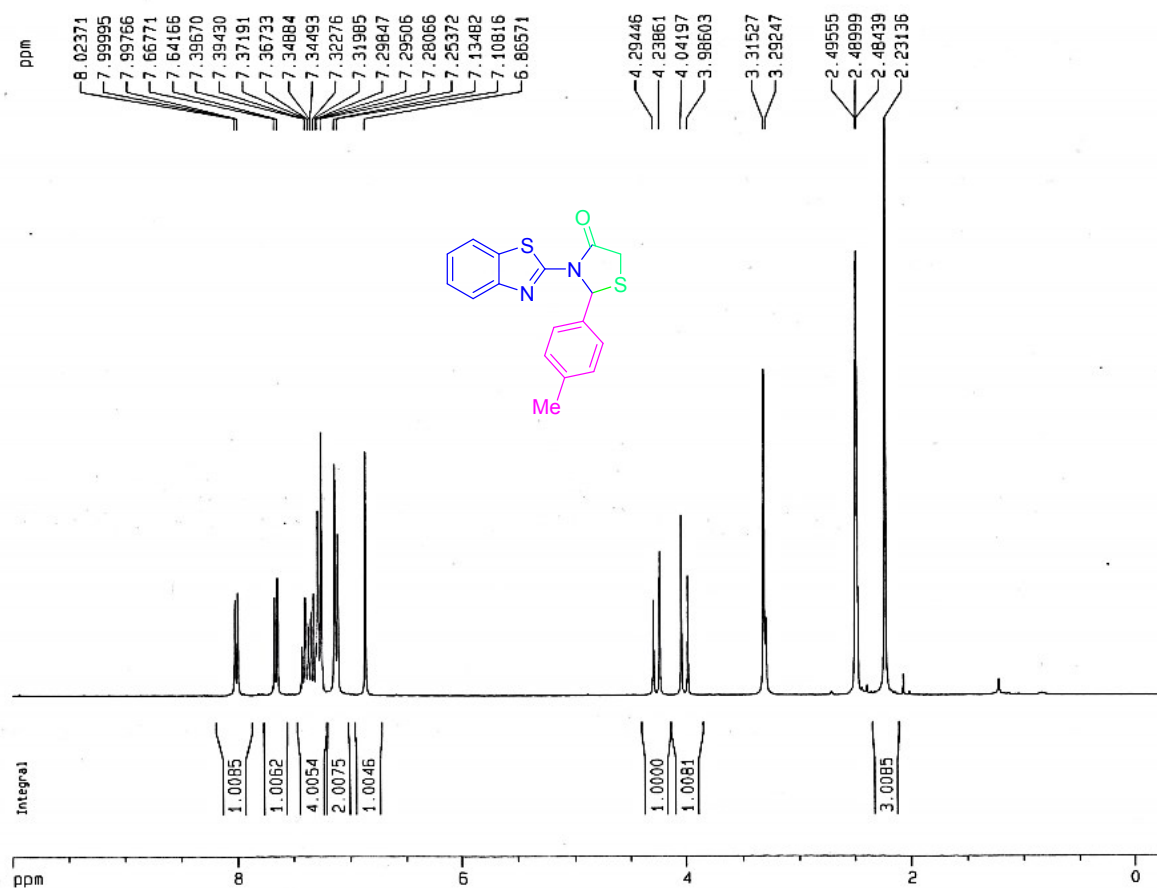

Fig. S47. The  $^{13}\text{C}$  NMR spectrum of 3-(Benzo[d]thiazol-2-yl)-2-(4-methylphenyl)thiazolidin-4-one (4p)

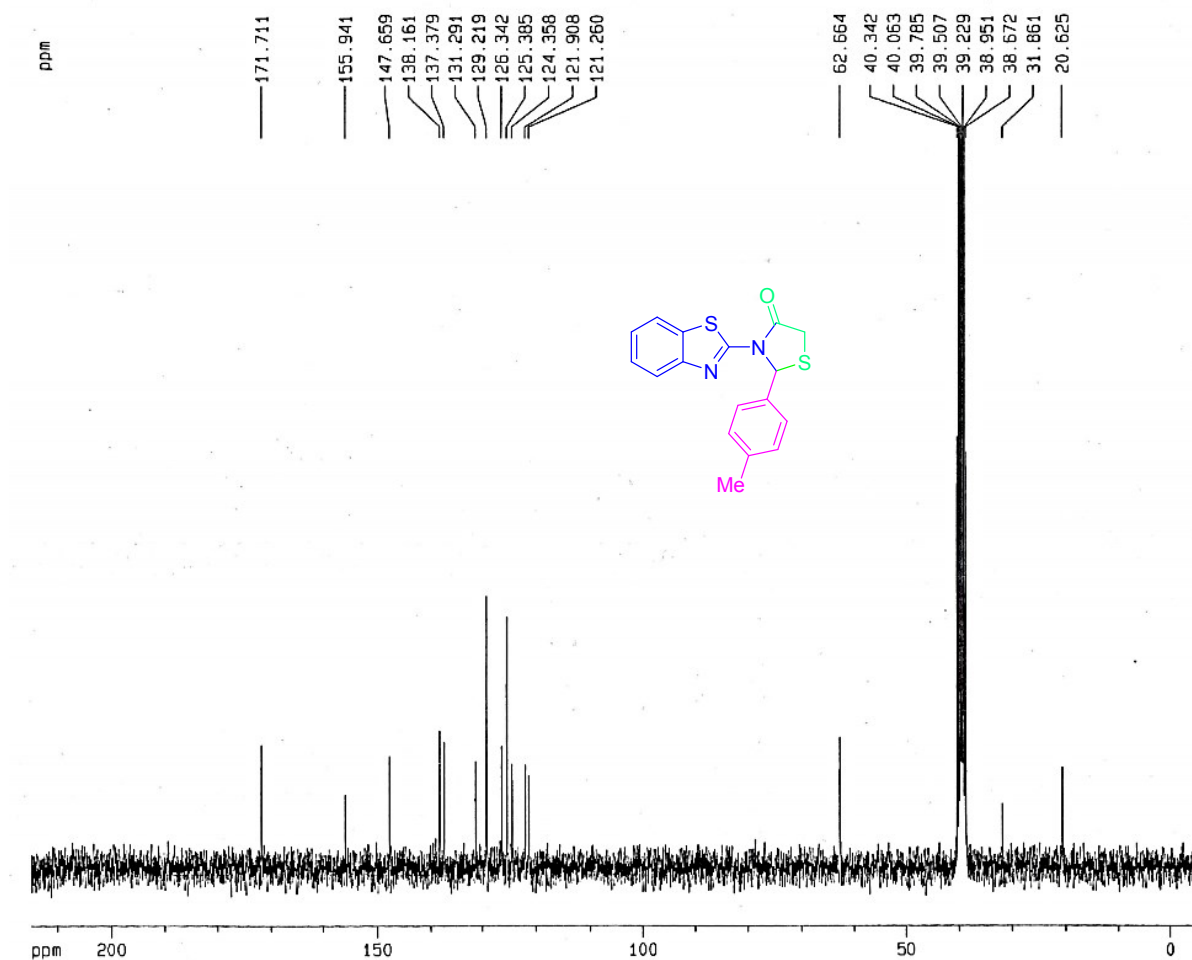

Fig. S48. The Mass spectrum of 3-(Benzo[d]thiazol-2-yl)-2-(4-methylphenyl)thiazolidin-4-one (4p)

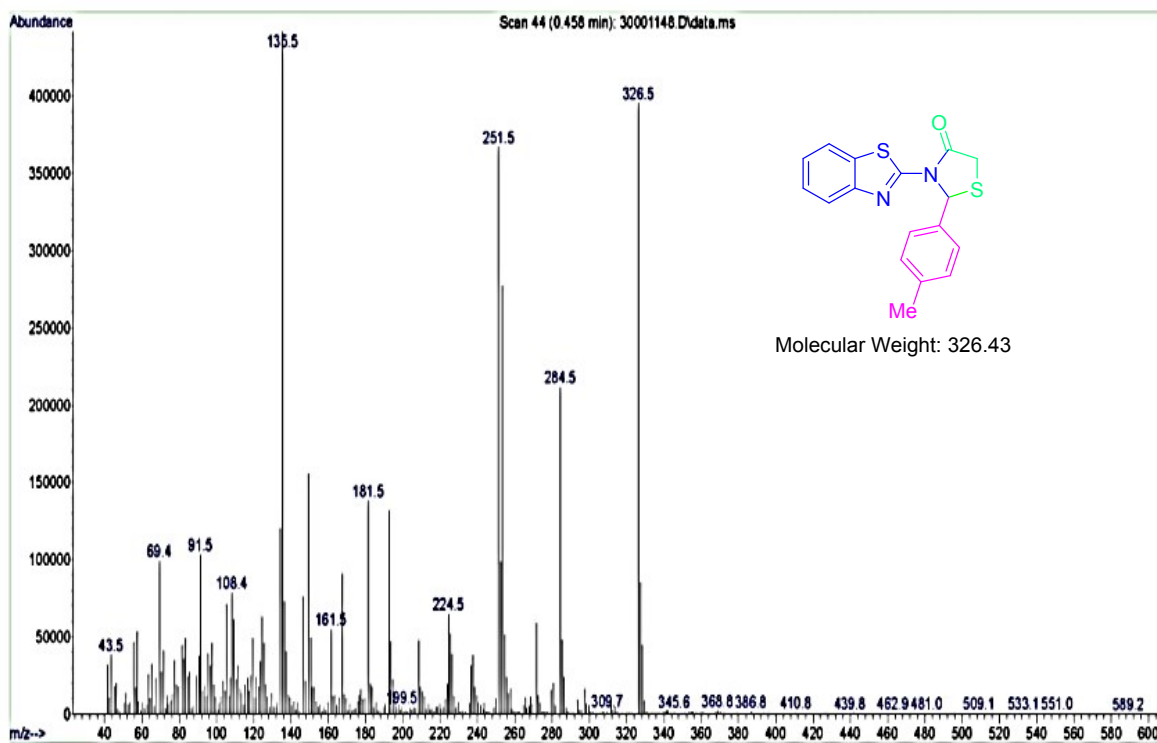

Supplement: d0ra08237f1.pdf [file d0ra08237f1.pdf]
